# Supplementary material for: On the stereoselectivity of 4-penten-1-oxyl radical 5-exo-trig cyclizations
Source: Royal Society of Chemistry journal article supplement (doi:10.1039/b611473c), 2006-01-01
Supplement: b611473c.pdf [file b611473c.pdf]

*Supporting Information for*

## On the Stereoselectivity of

### 4-Penten-1-oxyl Radical 5-*exo*-trig Cyclizations

*Jens Hartung,\* Kristina Daniel,<sup>a</sup> Christian Rummey,<sup>b</sup> and Gerhard Bringmann<sup>b</sup>*

<sup>a</sup> Fachbereich Chemie, Organische Chemie, Technische Universität Kaiserslautern,

Erwin-Schrödinger-Straße, D-67663 Kaiserslautern, Germany

Fax: +49 631 205 3921

E-mail: hartung@chemie.uni-kl.de

<sup>b</sup> Institut für Organische Chemie, Universität Würzburg,

Am Hubland, D-97074 Würzburg, Germany

## Contents

|    |                                                                                                                                                                             |    |
|----|-----------------------------------------------------------------------------------------------------------------------------------------------------------------------------|----|
| 1  | General Remarks.....                                                                                                                                                        | 2  |
| 2  | Experimental Procedure – Instrumentation and Reagents.....                                                                                                                  | 2  |
| 3  | Synthesis of 3-(1,1-Dimethylethyl)-4-penten-1-yl <i>p</i> -toluenesulfonate .....                                                                                           | 3  |
| 4  | Synthesis and Spectral Characterization of 4- <i>tert</i> -Butyl-2-methyltetrahydrofuran ( <b>3d</b> ) and 3- <i>tert</i> -Butyl-2-methyltetrahydrofuran ( <b>3f</b> )..... | 4  |
| 5  | UHF-Calculated Energies of Radicals <b>1</b> , <i>cis</i> - <b>2</b> , <i>trans</i> - <b>2</b> , and Transition Structures <b>7–10</b> .....                                | 7  |
| 6  | Selected Parameter of UHF/6-31+G*-Calculated Transition Structures <b>7–10</b> .....                                                                                        | 10 |
| 7  | Atomic Coordinates of UB3LYP/6-31+G*-Calculated Geometries of Alkoxy Radicals <b>1</b> , Cyclized Radicals <b>2</b> , and Transition Structures <b>7–10</b> .....           | 11 |
| 8  | B3LYP/6-31+G*-Calculated Data of Methyl- and <i>tert</i> -Butyl-substituted Tetrahydropyrans – <i>A</i> -Value Analysis.....                                                | 44 |
| 9  | B3LYP/6-31+G*-Calculated Data of Distinguished Conformers of Cyclopentane and the Chair Conformation of Cyclohexane.....                                                    | 55 |
| 10 | References.....                                                                                                                                                             | 57 |

## 1 General Remarks

(i) The compound numbering in this Supporting Information is consistent with that of the accompanying publication. (ii) The cited literature exclusively refers to this Supporting Information. The following abbreviations have been used: DABCO = 1,4-diazabicyclo[2.2.2]octane, DTA = differential thermoanalysis, E = envelope conformation MTB = *tert*-butyl methyl ether, T = twist conformation.

## 2 Experimental Procedure – Instrumentation and Reagents

Melting points [°C] were determined on a Koffler hot-plate melting point microscope (company *Reichert*) and are uncorrected. Differential-thermoanalysis (DTA) of substituted *N*-[(*tert*-butyl)pentenoxy]thiazole-2(3*H*)thiones **6d** and **6f** were performed on a Thermal-Analyzer 9000 (*Du Pont*). Photochemical reactions are performed using a Rayonet<sup>®</sup> Photoreactor equipped with sixteen RPR-350 nm light bulbs (*The Southern New England*). <sup>1</sup>H And <sup>13</sup>C spectra were recorded with a AC400 spectrometer (*Bruker*). Residual CHCl<sub>3</sub> in the applied solvent CDCl<sub>3</sub> served as internal standard (<sup>1</sup>H NMR). Mass spectra were recorded with a Match 7 instrument (*Varian*) using electron impact techniques (EI, 70 eV ionization energy). Gas chromatography was performed using a Carlo Erba GC 6000 instrument (Vega Series 2, FID) using a DB-225 column (30 m × 0.32 mm, 0.25 μm layer) from *J&W Scientific* and a Spectra Physics Integrator 4290. Helium was used as carrier gas (flow rate of 3 mL/min, 80 kPa pressure). The retention times *t<sub>R</sub>* refer to the following temperature program: 120 °C (5 min), 120 °C → 220 (10 °C min<sup>-1</sup>), 220 °C (15 min); injector and detector temperature: 240 °C. *n*-C<sub>14</sub>H<sub>30</sub> served as internal standard for quantitative GC analysis. Reaction progress was monitored via thin layer chromatography on aluminum plates coated with silica gel (60 F<sub>254</sub>, *Merck*). The products were detected via UV-light (254 nm) or with Ekkert's reagent. Combustion analysis was performed using a Carlo Erba 1106 instrument. NEt<sub>4</sub>OH (25% solution in MeOH) and Bu<sub>3</sub>SnH were commercially available and were used as received (*Fluka*, *Merck*, *Lancaster*). *N*-(Hydroxy)-4-(*p*-chlorophenyl)thiazole-2(3*H*)thione,<sup>1</sup> 2-(1,1-dimethylethyl)-4-penten-1-yl *p*-toluenesulfonate (**5d**),<sup>2</sup> and 4,4-dimethyl-2-penten-1-ol<sup>3</sup> were prepared according to literature procedures.

### 3 Synthesis of 3-(1,1-dimethylethyl)-4-penten-1-yl *p*-toluenesulfonate (5f)

**3.1 Ethyl 3-(1,1-dimethylethyl)-4-pentenoate.**<sup>4</sup> A two-necked round-bottomed flask equipped with a reflux condenser and a magnetic stir bar was charged with 4,4-dimethyl-2-penten-1-ol (2.18 g, 19.35 mmol), ethyl orthoacetate (22 g, 135.4 mmol), and propionic acid (86 mg, 1.2 mmol). The reaction mixture was heated to 138 °C for 5 h, which led to a conversion of the starting alcohol of 95 %. An excess of ethyl orthoacetate was removed by distillation (60 °C, 20 mbar). The remaining liquid was purified by chromatography [SiO<sub>2</sub>, petroleum ether/Et<sub>2</sub>O = 1/1, (v/v)] to afford ethyl 3-(1,1-dimethylethyl)-4-pentenoate (1.92 g, 54 % yield) as colorless liquid [bp = 60 °C (20 mbar)].

**3.2 3-(1,1-Dimethylethyl)-4-penten-1-ol.**<sup>5</sup> To a stirred suspension of LiAlH<sub>4</sub> (290 mg, 7.6 mmol) in anhydrous Et<sub>2</sub>O (20 mL) was added in drops a solution of ethyl 3-(1,1-dimethylethyl)-4-pentenoate (1.4 g, 7.6 mmol) in dry Et<sub>2</sub>O (5 mL) at 0 °C. The mixture was heated in an oil bath (40 °C) for 1 h and was afterwards allowed to cool to 0 °C. H<sub>2</sub>O was added until no further gas evolved. Salts, which formed upon hydrolysis, were dissolved by adding a satd. aqueous solution of NH<sub>4</sub>Cl. The organic phase was separated. The aqueous layer was extracted with Et<sub>2</sub>O (2 × 10 mL). The combined organic phases were washed with brine, dried (MgSO<sub>4</sub>), and concentrated under reduced pressure. The residual yellow oil was purified by bulb-to-bulb distillation to furnish 604 mg (56 %) of 3-(1,1-dimethylethyl)-4-penten-1-ol as colorless oil. The <sup>1</sup>H NMR spectral data were in accord with the values reported in the literature.<sup>5</sup>

**3.3 3-(1,1-dimethyl)-4-penten-1-yl *p*-toluenesulfonate (5f).** A round-bottomed flask was charged with 3-(1,1-dimethylethyl)-4-penten-1-ol (324 mg, 2.28 mmol), CH<sub>2</sub>Cl<sub>2</sub> (3 mL), and DABCO (510 mg, 4.56 mmol). The solution was stirred for 10 min at 0 ° and was afterwards treated in portions with *p*-toluenesulfonyl chloride (652 mg, 3.42 mmol), to afford a slurry, which was stirred for 2 h at 20 °C. The reaction mixture was poured into a mixture of MTB/H<sub>2</sub>O [60 mL, 1/1 (v/v)]. The aqueous phase was separated and washed with MTB (3 × 30 mL). The combined organic phases were washed with 2M HCl, satd. aqueous NaHCO<sub>3</sub>, and H<sub>2</sub>O to afford a clear layer, which was dried (MgSO<sub>4</sub>) and concentrated under reduced pressure. The remaining oil was purified by column chromatography [SiO<sub>2</sub>, petroleum ether/Et<sub>2</sub>O = 1/1 (v/v)] to yield 3-(1,1-dimethylethyl)-4-penten-1-yl *p*-toluenesulfonate (**5f**) as a colorless oil. Yield: 0.96 g (70 %). <sup>1</sup>H-NMR (CDCl<sub>3</sub>, 250 MHz): δ = 0.81 [s, 9 H, C(CH<sub>3</sub>)<sub>3</sub>], 1.29–1.44 (m, 1 H, 5-H), 1.73 (ddd, *J* 11.9, 9.8, 2.4, 1 H, 6-H), 1.91 (m<sub>c</sub>, 1 H, 5-H), 2.44 (s, 3 H, Ar-CH<sub>3</sub>), 3.90 (dt, *J* 9.5, 6.4, 1 H, 4-H), 4.07 (ddd, *J* 9.5, 7.3, 6.4, 1 H, 4-H), 4.79 (dd, *J* 17.1, 2.1, 1 H, =CH<sub>2</sub>), 4.97 (dd, *J* 10.4,

2.1, 1 H, =CH<sub>2</sub>), 5.44 (dt, *J* 17.1, 10.1, 1 H, =CH), 7.34 (m<sub>c</sub>, 2 H, Ar), 7.79 (m<sub>c</sub>, 2 H, Ar). <sup>13</sup>C NMR (63 MHz; CDCl<sub>3</sub>):  $\delta$  = 22.0 (Ar-CH<sub>3</sub>), 27.9 (CH<sub>3</sub>), 28.5 [C(CH<sub>3</sub>)<sub>3</sub>], 32.7 (C-2), 51.2 (C-3), 70.1 (C-1), 117.9 (C-5), 128.3 (Ar), 130.2 (Ar), 138.6 (C-4). MS (70 eV, EI): *m/z* = 155 [C<sub>7</sub>H<sub>7</sub>SO<sub>2</sub><sup>+</sup>] (5 %), 91 [C<sub>7</sub>H<sub>7</sub><sup>+</sup>] (19), 68 (100), 57 (68), 41 (39). Calcd. for C<sub>16</sub>H<sub>24</sub>SO<sub>3</sub> (296.42): C, 64.83; H, 8.16; S, 10.82. Found: C, 64.92, H, 7.80, S, 10.91.

## 4 Synthesis and Spectral Characterization of 4-*tert*-Butyl-2-methyltetrahydrofuran (3d) and 3-*tert*-Butyl-2-methyltetrahydrofuran (3f)

### 4.1 Synthesis of 2-(Iodomethyl)tetrahydrofurans

**General procedure.** A round-bottomed flask equipped with a magnetic stir bar was charged with I<sub>2</sub> (1.52 g, 6.0 mmol), MeCN (9 mL), and saturated aqueous solution of NaHCO<sub>3</sub> (4 mL). 2-(1,1-Dimethylethyl)-4-penten-1-ol or 3-(1,1-dimethylethyl)-4-penten-1-ol (475 mg, 3.3 mmol) was added in small portions at 0 °C and stirring was continued for 1 h at 0 °C and for 2–3 h at 20 °C. The organic solvent was removed under reduced pressure to afford a brown residue that was taken up in MTB (20 mL). The organic phase was successively washed with an aqueous solution of Na<sub>2</sub>S<sub>2</sub>O<sub>3</sub> [2 × 10 mL 10 % (w/w)], H<sub>2</sub>O (15 mL), and brine (10 mL). The ethereal solution was dried (MgSO<sub>4</sub>) and concentrated under reduced pressure to afford an oil, which was purified by chromatography (SiO<sub>2</sub>).

**4.2 4-(*tert*-Butyl)-2-(iodomethyl)tetrahydrofuran.** Eluent used for chromatographic purification: petroleum ether/Et<sub>2</sub>O = 5/1 (*v/v*), *R<sub>f</sub>* = 0.45. Yield: 650 mg (73 %), colorless oil, *cis:trans* = 91:9 (GC). GC: *t<sub>r</sub>* = 8.59 min (*cis*-isomer), 8.67 min (*trans*-isomer). Calcd. for C<sub>9</sub>H<sub>17</sub>OI (268.14): C, 40.31; H, 6.39. Found: C, 40.43; H, 6.08. MS (70 eV, EI): *m/z* (%) = 268 [M<sup>+</sup>] (2), 141 [C<sub>9</sub>H<sub>17</sub>O<sup>+</sup>] (8), 127 [C<sub>8</sub>H<sub>15</sub>O<sup>+</sup>] (100), 83 [C<sub>5</sub>H<sub>7</sub>O<sup>+</sup>] (16), 57 [C<sub>4</sub>H<sub>9</sub><sup>+</sup>] (54). *cis*-Isomer: <sup>1</sup>H-NMR (CDCl<sub>3</sub>, 250 MHz):  $\delta$  = 0.89 [s, 9 H, C(CH<sub>3</sub>)<sub>3</sub>], 1.37 (m<sub>c</sub>, 1 H, 3-H), 2.02–2.15 (m, 1 H, 3-H), 2.17–2.27 (m, 1 H, 4-H), 3.25 (dd, *J* 5.2, 6.1, 2 H, CH<sub>2</sub>I), 3.69 (t, *J* 9.1, 1 H, 5-H), 3.87 (t, *J* 9.1, 1 H, 5-H), 3.89–4.01 (m, 1 H, 2-H). <sup>13</sup>C-NMR (CDCl<sub>3</sub>, 63 MHz):  $\delta$  = 10.7 (CH<sub>2</sub>I), 28.0 (CH<sub>3</sub>), 31.7 [C(CH<sub>3</sub>)<sub>3</sub>], 35.1 (3-C), 51.5 (4-C), 70.3 (5-C), 79.5 (2-C). *trans*-Isomer: <sup>1</sup>H-NMR (CDCl<sub>3</sub>, 250 MHz):  $\delta$  = 0.88 (s, 9 H, *t*Bu), 1.37 (m<sub>c</sub>, 1 H, 3-H), 1.76 (m<sub>c</sub>, 1 H, 3-H), 2.23 (m<sub>c</sub>, 1 H, 4-H), 3.19 (dd, *J* 5.2, 2.8, 2 H, CH<sub>2</sub>I), 3.54 (t, *J* 9.1, 1 H, 5-H), 3.69 (t, *J* 9.1, 1 H, 5-H), 3.92–4.05 (m, 1 H, 2-H). <sup>13</sup>C-NMR (CDCl<sub>3</sub>, 63 MHz):  $\delta$  = 11.2 (CH<sub>2</sub>I), 26.2 [C(CH<sub>3</sub>)<sub>3</sub>], 31.3 (CH<sub>3</sub>), 33.4 (3-C), 49.8 (4-C), 70.7 (5-C), 79.5 (2-C).

**4.3 *trans*-3-(*tert*-Butyl)-2-(iodomethyl)tetrahydrofuran.** Eluent used for chromatographic purification: petroleum ether/Et<sub>2</sub>O = 9/1 (v/v), *R*<sub>f</sub> = 0.30. Yield: 726 mg (2.95 mmol, 82 %). GC: *t*<sub>r</sub> = 13.43 min. <sup>1</sup>H-NMR (CDCl<sub>3</sub>, 250 MHz): δ = 0.90 [s, 9 H, C(CH<sub>3</sub>)<sub>3</sub>], 1.74–1.80 (m, 2 H, 4-H), 1.90–2.06 (m, 1 H, 3-H), 3.22 (dd, *J* 10.4, 6.7, 1 H, 6-H), 3.37 (dd, *J* 10.7, 3.7, 1 H, 6-H), 3.73–3.92 (m, 3 H, CHO, CH<sub>2</sub>O). <sup>13</sup>C-NMR (CDCl<sub>3</sub>, 63 MHz): δ = 13.5 (CH<sub>2</sub>J), 28.2 (CH<sub>3</sub>), 29.5 [C(CH<sub>3</sub>)<sub>3</sub>], 32.3 (C-3), 55.8 (C-4), 68.3 (C-5), 80.0 (C-2). MS (70 eV, EI): *m/z* (%) = 268 (C<sub>9</sub>H<sub>17</sub>OI<sup>+</sup>, 2%), 141 (C<sub>9</sub>H<sub>17</sub>O<sup>+</sup>, 6), 127 (C<sub>15</sub>H<sub>8</sub>O<sup>+</sup>, 78), 57 (C<sub>4</sub>H<sub>9</sub><sup>+</sup>, 100), 41 (C<sub>3</sub>H<sub>5</sub><sup>+</sup>, 37). Calcd. for C<sub>9</sub>H<sub>17</sub>OI (268.14: C, 40.31; H, 6.39. Found: C, 40.32; H, 6.10.

**4.4 4-(*tert*-Butyl)-2-methyltetrahydrofuran (3d) and *trans*-3-(*tert*-Butyl)-2-methyltetrahydrofuran (3f)**

**General procedure for the conversion of 2-(iodomethyl)tetrahydrofurans into 2-methyltetrahydrofurans.** A two-necked round-bottomed flask equipped with Ar inlet was charged with LiAlH<sub>4</sub> (0.25 g, 6.6 mmol), LiH (0.10 g, 12.6 mmol), and dry THF (25 mL). To this slurry was added at 20 °C in drops a solution of 0.56 g (2.1 mmol) of 4-(*tert*-butyl)-2-(iodomethyl)tetrahydrofuran (*cis:trans* = 91:9) or *trans*-3-(*tert*-butyl)-2-(iodomethyl)tetrahydrofuran in anhydrous THF (5 mL). Stirring was continued for 14 h at 20 °C. H<sub>2</sub>O (5 mL) was added at 0°C to afford a colorless precipitate, which was dissolved with a minimum volume of 10% aq. H<sub>2</sub>SO<sub>4</sub>. The aqueous phase was separated and washed with MTB (3 × 20 mL). The combined organic phases were washed with brine (30 mL), dried (MgSO<sub>4</sub>), and concentrated under reduced pressure. The residual oil was purified by column chromatography [SiO<sub>2</sub>, petroleum ether/Et<sub>2</sub>O = 2:1 (v/v)]

**4-*tert*-Butyl-2-methyltetrahydrofuran (3d).** Yield: 110 mg (1.64 mmol, 78 %); *R*<sub>f</sub> = 0.55 [SiO<sub>2</sub>, petroleum ether/Et<sub>2</sub>O = 2:1 (v/v)]; colorless volatile oil; *cis:trans* = 91:9 (GC: *t*<sub>r</sub> = 3.78 for *cis*-**3d** and 4.06 min for *trans*-**3d**). Calcd. for C<sub>9</sub>H<sub>18</sub>O (142.24): C, 76.00; H, 12.76. Found: C, 76.09; H, 12.73. MS (70 eV, EI): *m/z* (%) = 142 [M<sup>+</sup>] (4), 127 [C<sub>8</sub>H<sub>15</sub>O<sup>+</sup>] (100), 83 [C<sub>5</sub>H<sub>7</sub>O<sup>+</sup>] (38), 57 [C<sub>4</sub>H<sub>9</sub><sup>+</sup>] (92), 41 [C<sub>3</sub>H<sub>5</sub><sup>+</sup>] (47). *cis*-**3d**: <sup>1</sup>H-NMR (CDCl<sub>3</sub>, 250 MHz): δ = 0.87 [s, 9 H, C(CH<sub>3</sub>)<sub>3</sub>], 1.25 (d, *J* 5.8, 3 H, CH<sub>3</sub>), 1.54 (m<sub>c</sub>, 1 H, 3-H), 1.90 (dt, *J*<sub>d</sub> 13.4, *J*<sub>t</sub> 6.7, 1 H, 3-H), 2.16 (m<sub>c</sub>, 1 H, 4-H), 3.66 (t, *J* 8.6, 1 H, 5-H), 3.75 (t, *J* 8.6, 1 H, 5-H), 3.93 (m<sub>c</sub>, 1 H, 2-H). <sup>13</sup>C-NMR (CDCl<sub>3</sub>, 63 MHz): δ = 21.0 (CH<sub>3</sub>), 28.0 [C(CH<sub>3</sub>)<sub>3</sub>], 36.3 (3-C), 51.4 (4-C), 69.3 (5-C), 76.5 (2-C). *trans*-**3d**: <sup>1</sup>H-NMR (CDCl<sub>3</sub>, 250 MHz) δ = 0.84 [s, 9 H, C(CH<sub>3</sub>)<sub>3</sub>], 1.85 (d, 3 H, *J* = 5.8 Hz, CH<sub>3</sub>), 1.44 (m, 1 H, *J* = 6.4, 12.2 Hz, 3-H), 1.78 (dt, *J* = 7.3, 12.2 Hz, 1 H, 3-H), 2.16 (m<sub>c</sub>, 1 H, 4-H), 3.44 (t, *J* = 8.9 Hz, 1 H, 5-H), 3.89 (t, *J* = 10.6

Hz, 1 H, 5-H), 3.96 (m, 1 H, 2-H).  $^{13}\text{C}$ -NMR ( $\text{CDCl}_3$ , 63 MHz):  $\delta$  = 20.8 ( $\text{CH}_3$ ), 23.0 [ $\text{C}(\text{CH}_3)_3$ ], 36.3 (3-C), 49.9 (4-C), 69.8 (5-C), 76.8 (2-C).

| compound                             | <i>cis</i> - <b>3d</b> | <i>trans</i> - <b>3d</b> |
|--------------------------------------|------------------------|--------------------------|
| Significant<br>NOESY<br>interactions | 3-H – 2- $\text{CH}_3$ | 3-H – 2-H                |
|                                      | 2-H – 4-H              | 3'-H – 2- $\text{CH}_3$  |
|                                      | 3'-H – 4-H             | 3'-H – 4-H               |

***trans*-3-*tert*-Butyl-2-methyltetrahydrofuran *trans*-(3f)**. Yield: 248 mg (85 %);  $R_f$  = 0.50 [ $\text{SiO}_2$ , petroleum ether/ $\text{Et}_2\text{O}$  = 2:1 (v/v)]; colorless volatile oil; diastereomerically pure [NMR, GC ( $t_r$  = 4.21 min)]. Calcd. for  $\text{C}_9\text{H}_{18}\text{O}$  (142.24): C, 76.00; H, 12.76: Found: C, 76.38; H, 12.93. MS (70 eV, EI):  $m/z$  (%) = 142 [ $\text{M}^+$ ] (1), 127 [ $\text{C}_8\text{H}_{15}\text{O}^+$ ] (24), 83 [ $\text{C}_5\text{H}_7\text{O}^+$ ] (26), 70 [ $\text{C}_4\text{H}_6\text{O}^+$ ] (100), 57 [ $\text{C}_4\text{H}_9^+$ ] (56).  $^1\text{H}$ -NMR ( $\text{CDCl}_3$ , 250 MHz):  $\delta$  = 0.88 [s, 9 H,  $\text{C}(\text{CH}_3)_3$ ], 1.22 (d,  $J$  6.1, 3 H,  $\text{CH}_3$ ), 1.61 ( $m_c$ , 1 H, 4-H), 1.72 (dq,  $J_d$  12.5,  $J_q$  7.0, 1 H, 4-H), 1.82–1.96 (m, 1 H, 4-H), 3.62–3.78 (m, 2 H, 5-H), 3.84 (dq,  $J$  12.2, 6.1, 1 H, 2-H).  $^{13}\text{C}$ -NMR ( $\text{CDCl}_3$ , 63 MHz):  $\delta$  = 15.7 ( $\text{CH}_3$ ), 28.3 [ $\text{C}(\text{CH}_3)_3$ ], 29.7 (4-C), 57.1 (3-C), 67.3 (5-C), 76.5 (2-C).

## 5 UHF-Calculated Energies of Radicals **1**, *cis-2*, *trans-2*, and Transition Structures **7–10**

**Table 5.1.** Computed energies ( $E$ ), zero point vibrational energies (ZPVE),  $\langle S^2 \rangle$  values, and relative heats of formation ( $\Delta\Delta H_f$ ) of radicals **1–3** <sup>a</sup>

|                                                                                                        | parameter              | <b>1</b>       | <i>cis-2</i>                | <i>trans-2</i>              |
|--------------------------------------------------------------------------------------------------------|------------------------|----------------|-----------------------------|-----------------------------|
| <b>1a</b> → <i>cis-2a</i> +<br><i>trans-2a</i><br>(R <sup>1</sup> = CH <sub>3</sub> )                  | $E + \text{ZPVE}^b$    | -308.251595    | -308.260999                 | -308.261216                 |
|                                                                                                        | ZPVE <sup>c</sup>      | 441430.5       | 443832.5                    | 443370.3                    |
|                                                                                                        | $\langle S^2 \rangle$  | 0.759          | 0.762                       | 0.762                       |
|                                                                                                        | $\Delta\Delta H_f^d$   | ≡ 0            | -24.7                       | -25.3                       |
|                                                                                                        | conformer <sup>e</sup> | - <sup>f</sup> | <sup>1</sup> T <sub>5</sub> | <sup>3</sup> T <sup>4</sup> |
| <b>1b</b> → <i>cis-2b</i> +<br><i>trans-2b</i><br>[R <sup>1</sup> = C(CH <sub>3</sub> ) <sub>3</sub> ] | $E + \text{ZPVE}^b$    | -425.261985    | -425.271998                 | -425.272707                 |
|                                                                                                        | ZPVE <sup>c</sup>      | 677237.8       | 680954.1                    | 680918.6                    |
|                                                                                                        | $\langle S^2 \rangle$  | 0.758777       | 0.762                       | 0.762                       |
|                                                                                                        | $\Delta\Delta H_f^d$   | ≡ 0            | -26.3                       | -28.2                       |
|                                                                                                        | conformer <sup>e</sup> | - <sup>f</sup> | <sup>1</sup> T <sub>5</sub> | <sup>3</sup> T <sup>4</sup> |
| <b>1c</b> → <i>cis-2c</i> +<br><i>trans-2c</i><br>(R <sup>2</sup> = CH <sub>3</sub> )                  | $E + \text{ZPVE}^b$    | -308.248186    | -308.256383                 | -308.256210                 |
|                                                                                                        | ZPVE <sup>c</sup>      | 439708.0       | 444682.7                    | 444515.6                    |
|                                                                                                        | $\langle S^2 \rangle$  | 0.759          | 0.762                       | 0.762                       |
|                                                                                                        | $\Delta\Delta H_f^d$   | ≡ 0            | -21.5                       | -21.1                       |
|                                                                                                        | conformer <sup>e</sup> | - <sup>f</sup> | <sup>3</sup> T <sup>4</sup> | <sup>3</sup> T <sup>4</sup> |
| <b>1d</b> → <i>cis-2d</i> +<br><i>trans-2d</i><br>[R <sup>2</sup> = C(CH <sub>3</sub> ) <sub>3</sub> ] | $E + \text{ZPVE}^b$    | -425.248794    | -425.265134                 | -425.264073                 |
|                                                                                                        | ZPVE <sup>c</sup>      | 680242.0       | 681888.7                    | 682482.0                    |
|                                                                                                        | $\langle S^2 \rangle$  | 0.772359       | 0.762                       | 0.750                       |
|                                                                                                        | $\Delta\Delta H_f^d$   | ≡ 0            | -42.9                       | -40.1                       |
|                                                                                                        | conformer <sup>e</sup> | - <sup>f</sup> | E <sub>3</sub>              | <sup>3</sup> T <sup>4</sup> |
| <b>1e</b> → <i>cis-2e</i> +<br><i>trans-2e</i><br>(R <sup>3</sup> = CH <sub>3</sub> )                  | $E + \text{ZPVE}^b$    | -308.247471    | -308.254008                 | -308.257112                 |
|                                                                                                        | ZPVE <sup>c</sup>      | 440987.4       | 445135.1                    | 443781.8                    |
|                                                                                                        | $\langle S^2 \rangle$  | 0.759          | 0.762                       | 0.762                       |
|                                                                                                        | $\Delta\Delta H_f^d$   | ≡ 0            | -17.2                       | -25.3                       |
|                                                                                                        | conformer <sup>e</sup> | - <sup>f</sup> | <sup>3</sup> T <sub>4</sub> | <sup>3</sup> T <sub>4</sub> |
| <b>1f</b> → <i>cis-2f</i> +<br><i>trans-2f</i><br>[R <sup>3</sup> = C(CH <sub>3</sub> ) <sub>3</sub> ] | $E + \text{ZPVE}^b$    | -425.252956    | -425.254563                 | -425.261936                 |
|                                                                                                        | ZPVE <sup>c</sup>      | 678908.1       | 682872.7                    | 683509.5                    |
|                                                                                                        | $\langle S^2 \rangle$  | 0.75917        | 0.763                       | 0.762                       |
|                                                                                                        | $\Delta\Delta H_f^d$   | ≡ 0            | -4.2                        | -23.6                       |
|                                                                                                        | conformer <sup>e</sup> | - <sup>f</sup> | <sup>3</sup> T <sub>4</sub> | <sup>4</sup> T <sup>5</sup> |

<sup>a</sup> UHF/6-31+G\*//UHF/6-31+G\*. <sup>b</sup>  $E$  (not temperature corrected) + ZPVE in a.u.; 1 a.u. = 2625.50 kJ mol<sup>-1</sup>. <sup>c</sup> ZPVE in J mol<sup>-1</sup>. <sup>d</sup>  $\Delta H_f$  values (ZPVE-corrected) in kJ mol<sup>-1</sup>, referenced versus the corresponding alkenoxyl radical **1**. <sup>e</sup> For cyclization products *cis-2* and *trans-3*. <sup>f</sup> Open chain conformation, see Figure 1 in the associated publication.

**Table 5.2.** UHF/6-31+G\*//UHF/6-31+G\*-calculated data, Boltzmann-weighted population  $P^a$ , and conformational details of transition structures 7–10

| 7–10                                     | data                                      | 7                                                               | 8                                                               | 9                                                               | 10                                                               |
|------------------------------------------|-------------------------------------------|-----------------------------------------------------------------|-----------------------------------------------------------------|-----------------------------------------------------------------|------------------------------------------------------------------|
| <b>a</b><br>R <sup>1</sup> = Me          | $E + ZPVE^a$                              | −308.223767                                                     | −308.222993                                                     | −308.225718                                                     | −308.221220                                                      |
|                                          | ZPVE <sup>b</sup>                         | 439448.4                                                        | 438673.2                                                        | 439361.6                                                        | 438732.0                                                         |
|                                          | $\langle S^2 \rangle$                     | 1.005                                                           | 1.025                                                           | 1.024                                                           | 1.006                                                            |
|                                          | $\Delta\Delta H_f^c$                      | 73.1                                                            | 75.1                                                            | 67.9                                                            | 79.7                                                             |
|                                          | $G^d$                                     | −308.255222                                                     | −308.254934                                                     | −308.257265                                                     | −308.253258                                                      |
|                                          | $\Delta G^e$                              | 5.4                                                             | 6.1                                                             | ≡ 0.0                                                           | 10.5                                                             |
|                                          | $P$ [%] <sup>f</sup>                      | 9.28                                                            | 6.99                                                            | 82.55                                                           | 1.18                                                             |
|                                          | conf. <sup>g</sup><br>subst. <sup>h</sup> | <sub>2</sub> T <sup>3</sup><br><i>a/b</i> <sup>ant</sup> iclin  | <sub>2</sub> T <sup>3</sup><br><i>e/b</i> <sup>syn</sup> clinal | <sub>2</sub> T <sup>3</sup><br><i>e/b</i> <sup>ant</sup> iclin  | <sub>2</sub> T <sup>3</sup><br><i>a/b</i> <sup>syn</sup> clinal  |
| <b>b</b><br>R <sup>1</sup> = <i>t</i> Bu | $E + ZPVE^a$                              | −425.230319                                                     | −425.233109                                                     | −425.235599                                                     | −425.229879                                                      |
|                                          | ZPVE <sup>b</sup>                         | 676906.7                                                        | 676083.5                                                        | 676618.1                                                        | 676970.3                                                         |
|                                          | $\langle S^2 \rangle$                     | 1.015                                                           | 1.024                                                           | 1.009                                                           | 1.013                                                            |
|                                          | $\Delta\Delta H_f^c$                      | 83.1                                                            | 75.8                                                            | 69.3                                                            | 84.3                                                             |
|                                          | $G^d$                                     | −425.266453                                                     | −425.269829                                                     | −425.271960                                                     | −425.266463                                                      |
|                                          | $\Delta G^e$                              | 14.5                                                            | 5.6                                                             | ≡ 0.0                                                           | 14.4                                                             |
|                                          | $P$ [%] <sup>f</sup>                      | 0.25                                                            | 9.43                                                            | 90.06                                                           | 0.27                                                             |
|                                          | conf. <sup>g</sup><br>subst. <sup>h</sup> | <sub>3</sub> T <sup>4</sup><br><i>pa/pe</i>                     | <sub>3</sub> T <sup>4</sup><br><i>pe/pa</i>                     | <sub>2</sub> T <sup>3</sup><br><i>e/b</i> <sup>ant</sup> iclin  | <sub>4</sub> T <sup>5</sup><br><i>b/a</i>                        |
| <b>c</b><br>R <sup>2</sup> = Me          | $E + ZPVE^a$                              | −308.222301                                                     | −308.216791                                                     | −308.220107                                                     | −308.219598                                                      |
|                                          | ZPVE <sup>b</sup>                         | 439365.6                                                        | 439539.6                                                        | 439972.9                                                        | 438771.3                                                         |
|                                          | $\langle S^2 \rangle$                     | 1.004                                                           | 1.023                                                           | 1.005                                                           | 1.023                                                            |
|                                          | $\Delta\Delta H_f^c$                      | 68.0                                                            | 82.4                                                            | 73.7                                                            | 75.1                                                             |
|                                          | $G^d$                                     | −308.253860                                                     | −308.248450                                                     | −308.251540                                                     | −308.251475                                                      |
|                                          | $\Delta G^e$                              | ≡ 0.0                                                           | 14.2                                                            | 6.1                                                             | 6.3                                                              |
|                                          | $P$ [%] <sup>f</sup>                      | 85.55                                                           | 0.28                                                            | 7.33                                                            | 6.84                                                             |
|                                          | conf. <sup>g</sup><br>subst. <sup>h</sup> | <sub>2</sub> T <sup>3</sup><br><i>e/b</i> <sup>ant</sup> iclin  | <sub>2</sub> T <sup>3</sup><br><i>a/b</i> <sup>syn</sup> clinal | <sub>2</sub> T <sup>3</sup><br><i>a/b</i> <sup>ant</sup> iclin  | <sub>3</sub> T <sup>4</sup><br><i>e/pa</i>                       |
| <b>d</b><br>R <sup>2</sup> = <i>t</i> Bu | $E + ZPVE^a$                              | −425.228959                                                     | −425.222832                                                     | −425.223846                                                     | −425.226118                                                      |
|                                          | ZPVE <sup>b</sup>                         | 677378.1                                                        | 677031.3                                                        | 678327.3                                                        | 676688.6                                                         |
|                                          | $\langle S^2 \rangle$                     | 1.007                                                           | 1.035                                                           | 1.009                                                           | 1.028                                                            |
|                                          | $\Delta\Delta H_f^c$                      | 52.1                                                            | 68.2                                                            | 65.5                                                            | 59.5                                                             |
|                                          | $G^d$                                     | −425.265552                                                     | −425.259396                                                     | −425.259780                                                     | −425.263285                                                      |
|                                          | $\Delta G^e$                              | ≡ 0.0                                                           | 16.2                                                            | 15.2                                                            | 6.0                                                              |
|                                          | $P$ [%] <sup>f</sup>                      | 91.38                                                           | 0.13                                                            | 0.20                                                            | 8.28                                                             |
|                                          | conf. <sup>g</sup><br>subst. <sup>h</sup> | <sub>2</sub> T <sup>3</sup><br><i>e/b</i> <sup>ant</sup> iclin  | <sub>1</sub> T <sup>5</sup><br><i>b/e</i>                       | <sub>2</sub> T <sup>3</sup><br><i>a/b</i> <sup>ant</sup> iclin  | <sub>2</sub> T <sup>3</sup><br><i>e/b</i> <sup>syn</sup> clinal  |
| <b>e</b><br>R <sup>3</sup> = Me          | $E + ZPVE^a$                              | −308.216807                                                     | −308.216459                                                     | −308.221074                                                     | −308.216912                                                      |
|                                          | ZPVE <sup>b</sup>                         | 440869.6                                                        | 439562.4                                                        | 439706.2                                                        | 439322.6                                                         |
|                                          | $\langle S^2 \rangle$                     | 1.002                                                           | 1.020                                                           | 1.005                                                           | 1.023                                                            |
|                                          | $\Delta\Delta H_f^c$                      | 80.5                                                            | 81.4                                                            | 69.3                                                            | 80.2                                                             |
|                                          | $G^d$                                     | −308.248191                                                     | −308.248173                                                     | −308.252609                                                     | −308.249039                                                      |
|                                          | $\Delta G^e$                              | 11.6                                                            | 11.6                                                            | ≡ 0.0                                                           | 9.4                                                              |
|                                          | $P$ [%] <sup>f</sup>                      | 0.85                                                            | 0.88                                                            | 96.08                                                           | 2.19                                                             |
|                                          | conf. <sup>g</sup><br>subst. <sup>h</sup> | <sub>2</sub> T <sup>3</sup><br><i>pa/b</i> <sup>ant</sup> iclin | <sub>3</sub> T <sup>4</sup><br><i>e/pa</i>                      | <sub>2</sub> T <sup>3</sup><br><i>pe/b</i> <sup>ant</sup> iclin | <sub>2</sub> T <sup>3</sup><br><i>pa/b</i> <sup>syn</sup> clinal |
| <b>f</b><br>R <sup>3</sup> = <i>t</i> Bu | $E + ZPVE^a$                              | −425.213874                                                     | −425.221503                                                     | −425.227835                                                     | −425.222413                                                      |
|                                          | ZPVE <sup>b</sup>                         | 678724.5                                                        | 677999.6                                                        | 677557.1                                                        | 677538.4                                                         |
|                                          | $\langle S^2 \rangle$                     | 1.006                                                           | 1.010                                                           | 1.007                                                           | 1.029                                                            |
|                                          | $\Delta\Delta H_f^c$                      | 102.6                                                           | 82.6                                                            | 66.0                                                            | 80.2                                                             |
|                                          | $G^d$                                     | −425.249976                                                     | −425.257746                                                     | −425.264133                                                     | −425.258472                                                      |
|                                          | $\Delta G^e$                              | 37.2                                                            | 16.8                                                            | ≡ 0.0                                                           | 14.9                                                             |
|                                          | $P$ [%] <sup>f</sup>                      | $3.1 \times 10^{-5}$                                            | 0.11                                                            | 99.64                                                           | 0.25                                                             |
|                                          | conf. <sup>g</sup><br>subst. <sup>h</sup> | <sub>2</sub> T <sup>3</sup><br><i>pa/b</i> <sup>ant</sup> iclin | <sub>3</sub> T <sup>4</sup><br><i>e/pa</i>                      | <sub>2</sub> T <sup>3</sup><br><i>pe/b</i> <sup>ant</sup> iclin | <sub>1</sub> T <sup>2</sup><br><i>b/pe</i>                       |



**Footnotes for Table 5.2** (page 8):

<sup>a</sup>  $E$  (not temperature corrected) + ZPVE in a.u.; 1 a.u. = 2625.50 kJ mol<sup>-1</sup>. <sup>b</sup> ZPVE in J mol<sup>-1</sup>. <sup>c</sup>  $\Delta\Delta H_f$  values (ZPVE-corrected) in kJ mol<sup>-1</sup>, referenced versus the associated alkenoxyl radical **1** (Table 5.1). <sup>d</sup>  $G$  (298.15) in a.u. <sup>e</sup>  $\Delta G$  in kJ mol<sup>-1</sup>, referenced versus the energetically lowest transition structure in each series of intermediates. <sup>f</sup>  $P^a$  [%] was calculated according to the following equation:

$$P^a = 100 \left[ \frac{\exp\{-\Delta G^a/RT\}}{\sum_{i=1}^4 \exp\{-\Delta G^i/RT\}} \right]$$

where  $P^a$  denotes the percentage contribution of a transition structure  $a$  to the formation of cyclization products **2**. <sup>h</sup> Classification of transition structures as distorted conformers of tetrahydrofuran (T = twist; E = envelope). <sup>i</sup> Arrangement of substituents in tetrahydrofuran-derived transition structures:  $R^n / =CH_2$  ( $n = 1, 2, \text{ or } 3$ ;  $a = axial$ ,  $b = bisectioanal$ ,  $e = equatorial$ ,  $pa = pseudoaxial$ ,  $pe = pseudoequatorial$  (see also Figures 5 and 6 of the associated publication). The notation  $b^{anticlinal} = anticlinal-bisectioanal$ ,  $b^{synclinal} = synclinal-bisectioanal$  describes the spatial arrangement of the  $=CH_2$  entity.

## 6 Selected Parameter of UHF/6-31+G\*-Calculated Transition Structures 7–10

**Table 6.1.** Geometrical parameter for the description of transition structures 7–10<sup>a</sup>

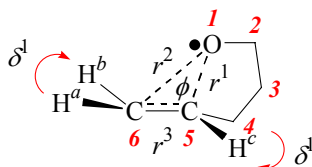

7–10

| 7–10                                     | parameter      | 7       | 8       | 9       | 10      |
|------------------------------------------|----------------|---------|---------|---------|---------|
| <b>a</b><br>R <sup>1</sup> = Me          | $r^1$ [Å]      | 1.916   | 1.931   | 1.916   | 1.932   |
|                                          | $r^2$ [Å]      | 2.649   | 2.633   | 2.641   | 2.631   |
|                                          | $r^3$ [Å]      | 1.403   | 1.403   | 1.402   | 1.404   |
|                                          | $\phi$ [°]     | 104.87  | 103.19  | 104.43  | 102.97  |
|                                          | $\delta^1$ [°] | -170.35 | -170.22 | -170.13 | -170.14 |
|                                          | $\delta^2$ [°] | 151.03  | 152.15  | 151.36  | 152.25  |
| <b>b</b><br>R <sup>1</sup> = <i>t</i> Bu | $r^1$ [Å]      | 1.927   | 1.936   | 1.924   | 1.930   |
|                                          | $r^2$ [Å]      | 2.661   | 2.641   | 2.645   | 2.670   |
|                                          | $r^3$ [Å]      | 1.401   | 1.402   | 1.401   | 1.397   |
|                                          | $\phi$ [°]     | 105.08  | 103.41  | 104.34  | 105.66  |
|                                          | $\delta^1$ [°] | -171.05 | -170.70 | -170.38 | -172.02 |
|                                          | $\delta^2$ [°] | 151.66  | 153.2   | 151.99  | 156.00  |
| <b>c</b><br>R <sup>2</sup> = Me          | $r^1$ [Å]      | 1.913   | 1.922   | 1.914   | 1.929   |
|                                          | $r^2$ [Å]      | 2.637   | 2.649   | 2.638   | 2.633   |
|                                          | $r^3$ [Å]      | 1.403   | 1.404   | 1.402   | 1.404   |
|                                          | $\phi$ [°]     | 104.30  | 104.45  | 104.3   | 103.27  |
|                                          | $\delta^1$ [°] | -170.09 | -170.87 | -170.20 | -170.21 |
|                                          | $\delta^2$ [°] | 151.24  | 150.47  | 151.16  | 152.04  |
| <b>d</b><br>R <sup>2</sup> = <i>t</i> Bu | $r^1$ [Å]      | 1.918   | 1.935   | 1.923   | 1.934   |
|                                          | $r^2$ [Å]      | 2.64    | 2.672   | 2.641   | 2.637   |
|                                          | $r^3$ [Å]      | 1.401   | 1.399   | 1.400   | 1.403   |
|                                          | $\phi$ [°]     | 104.30  | 105.40  | 104.18  | 103.29  |
|                                          | $\delta^1$ [°] | -170.24 | -173.13 | -170.59 | -170.35 |
|                                          | $\delta^2$ [°] | 151.51  | 152.70  | 151.86  | 152.11  |
| <b>e</b><br>R <sup>3</sup> = Me          | $r^1$ [Å]      | 1.913   | 1.929   | 1.912   | 1.930   |
|                                          | $r^2$ [Å]      | 2.629   | 2.615   | 2.635   | 2.628   |
|                                          | $r^3$ [Å]      | 1.404   | 1.403   | 1.403   | 1.404   |
|                                          | $\phi$ [°]     | 103.81  | 102.21  | 104.21  | 102.93  |
|                                          | $\delta^1$ [°] | -169.13 | -169.41 | -169.92 | -170.02 |
|                                          | $\delta^2$ [°] | 150.40  | 152.76  | 150.42  | 151.57  |
| <b>f</b><br>R <sup>3</sup> = <i>t</i> Bu | $r^1$ [Å]      | 1.912   | 1.924   | 1.913   | 1.928   |
|                                          | $r^2$ [Å]      | 2.568   | 2.590   | 2.613   | 2.631   |
|                                          | $r^3$ [Å]      | 1.404   | 1.402   | 1.403   | 1.402   |
|                                          | $\phi$ [°]     | 100.42  | 101.15  | 102.91  | 103.22  |
|                                          | $\delta^1$ [°] | -167.85 | -168.30 | -169.83 | -169.92 |
|                                          | $\delta^2$ [°] | 151.86  | 155.42  | 151.95  | 150.87  |

<sup>a</sup>  $r^1$  = O1–C5,  $r^2$  = O1–C6,  $r^3$  = C5–C6,  $\phi$  = O1–C5–C6,  $\delta^1$  = C5–C6–H<sup>a</sup>–H<sup>b</sup>,  $\delta^2$  = C6–C5–C4–H<sup>c</sup>

**7 Atomic Coordinates of UB3LYP/6-31+G\*-Calculated Geometries of Alkoxy Radicals 1, Cyclized Radicals 2, and Transition Structures 7–10**

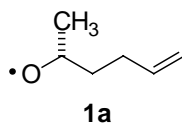

Standard orientation:

| Center Number | Atomic Number | Atomic Type | Coordinates (Angstroms) |           |           |
|---------------|---------------|-------------|-------------------------|-----------|-----------|
|               |               |             | X                       | Y         | Z         |
| 1             | 8             | 0           | 1.886679                | 1.284646  | -0.155816 |
| 2             | 6             | 0           | 1.517385                | 0.060520  | 0.351543  |
| 3             | 6             | 0           | 0.175762                | -0.442833 | -0.204935 |
| 4             | 6             | 0           | -0.994960               | 0.494453  | 0.150749  |
| 5             | 6             | 0           | -2.301752               | 0.038679  | -0.437707 |
| 6             | 6             | 0           | -3.392702               | -0.291095 | 0.261709  |
| 7             | 6             | 0           | 2.693067                | -0.894883 | -0.021555 |
| 8             | 1             | 0           | 1.485693                | 0.108325  | 1.457056  |
| 9             | 1             | 0           | 0.262830                | -0.533450 | -1.296324 |
| 10            | 1             | 0           | -0.023243               | -1.447586 | 0.192570  |
| 11            | 1             | 0           | -1.087856               | 0.574940  | 1.242652  |
| 12            | 1             | 0           | -0.753682               | 1.500072  | -0.224691 |
| 13            | 1             | 0           | -2.334572               | -0.025262 | -1.527640 |
| 14            | 1             | 0           | -4.308522               | -0.615427 | -0.226232 |
| 15            | 1             | 0           | -3.410429               | -0.243094 | 1.349606  |
| 16            | 1             | 0           | 2.473388                | -1.884974 | 0.391875  |
| 17            | 1             | 0           | 2.788265                | -0.970636 | -1.108769 |
| 18            | 1             | 0           | 3.633898                | -0.529116 | 0.397610  |

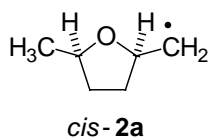

Standard orientation:

| Center Number | Atomic Number | Atomic Type | Coordinates (Angstroms) |           |           |
|---------------|---------------|-------------|-------------------------|-----------|-----------|
|               |               |             | X                       | Y         | Z         |
| 1             | 8             | 0           | 0.028835                | -0.930727 | 0.080495  |
| 2             | 6             | 0           | 1.197194                | -0.151735 | 0.359553  |
| 3             | 6             | 0           | 0.838247                | 1.267236  | -0.183895 |
| 4             | 6             | 0           | -0.705513               | 1.318199  | -0.069921 |
| 5             | 6             | 0           | -1.101041               | -0.107568 | 0.393759  |
| 6             | 6             | 0           | 2.391135                | -0.788071 | -0.245839 |
| 7             | 1             | 0           | 1.325296                | -0.080128 | 1.455874  |
| 8             | 1             | 0           | 3.380268                | -0.610454 | 0.162908  |
| 9             | 1             | 0           | 2.290792                | -1.350669 | -1.168493 |
| 10            | 1             | 0           | 1.158868                | 1.352866  | -1.227082 |
| 11            | 1             | 0           | 1.344540                | 2.052515  | 0.386903  |
| 12            | 1             | 0           | -1.161693               | 1.546153  | -1.040051 |
| 13            | 1             | 0           | -1.050339               | 2.076277  | 0.641944  |
| 14            | 6             | 0           | -2.340530               | -0.691334 | -0.263330 |
| 15            | 1             | 0           | -1.231464               | -0.109686 | 1.490328  |
| 16            | 1             | 0           | -2.224250               | -0.707854 | -1.353421 |
| 17            | 1             | 0           | -2.517339               | -1.715840 | 0.081355  |
| 18            | 1             | 0           | -3.222315               | -0.087725 | -0.016182 |

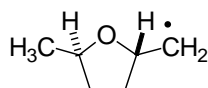

**trans-2a**

Standard orientation:

| Center Number | Atomic Number | Atomic Type | Coordinates (Angstroms) |           |           |
|---------------|---------------|-------------|-------------------------|-----------|-----------|
|               |               |             | X                       | Y         | Z         |
| 1             | 8             | 0           | 0.023019                | -0.956550 | 0.008443  |
| 2             | 6             | 0           | 1.166293                | -0.167930 | 0.406502  |
| 3             | 6             | 0           | 0.840715                | 1.272943  | -0.070812 |
| 4             | 6             | 0           | -0.688079               | 1.302857  | 0.034378  |
| 5             | 6             | 0           | -1.071547               | -0.115048 | -0.413199 |
| 6             | 6             | 0           | 2.414182                | -0.756939 | -0.140565 |
| 7             | 1             | 0           | 1.213809                | -0.168933 | 1.508378  |
| 8             | 1             | 0           | 2.407221                | -1.213861 | -1.125410 |
| 9             | 1             | 0           | 3.350074                | -0.690176 | 0.405093  |
| 10            | 1             | 0           | 1.162114                | 1.403298  | -1.111542 |
| 11            | 1             | 0           | 1.345556                | 2.029431  | 0.538294  |
| 12            | 1             | 0           | -1.152381               | 2.077225  | -0.586199 |
| 13            | 1             | 0           | -1.000379               | 1.467840  | 1.074442  |
| 14            | 1             | 0           | -1.116734               | -0.151393 | -1.513972 |
| 15            | 6             | 0           | -2.374781               | -0.656077 | 0.157467  |
| 16            | 1             | 0           | -3.223862               | -0.053289 | -0.189253 |
| 17            | 1             | 0           | -2.535785               | -1.690874 | -0.163397 |
| 18            | 1             | 0           | -2.354482               | -0.635702 | 1.253389  |

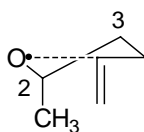

**7a**

Standard orientation:

| Center Number | Atomic Number | Atomic Type | Coordinates (Angstroms) |           |           |
|---------------|---------------|-------------|-------------------------|-----------|-----------|
|               |               |             | X                       | Y         | Z         |
| 1             | 8             | 0           | -0.142509               | -0.769011 | -1.083277 |
| 2             | 6             | 0           | -1.206110               | -0.120346 | -0.447834 |
| 3             | 6             | 0           | -0.749641               | 1.319236  | -0.132937 |
| 4             | 6             | 0           | 0.644034                | 1.204564  | 0.516185  |
| 5             | 6             | 0           | 1.463813                | 0.183823  | -0.232626 |
| 6             | 6             | 0           | 2.072442                | -0.883204 | 0.387596  |
| 7             | 1             | 0           | -2.005059               | -0.072171 | -1.212707 |
| 8             | 1             | 0           | -1.455246               | 1.857267  | 0.512936  |
| 9             | 1             | 0           | -0.668600               | 1.874272  | -1.075570 |
| 10            | 1             | 0           | 0.558443                | 0.909723  | 1.568827  |
| 11            | 1             | 0           | 1.151812                | 2.178220  | 0.495708  |
| 12            | 1             | 0           | 1.811109                | 0.468274  | -1.222157 |
| 13            | 1             | 0           | 1.838243                | -1.145573 | 1.416342  |
| 14            | 1             | 0           | 2.732708                | -1.551420 | -0.156920 |
| 15            | 6             | 0           | -1.750922               | -0.887871 | 0.765237  |
| 16            | 1             | 0           | -1.007380               | -0.945259 | 1.568671  |
| 17            | 1             | 0           | -2.653143               | -0.406523 | 1.165393  |
| 18            | 1             | 0           | -2.004517               | -1.911936 | 0.471970  |

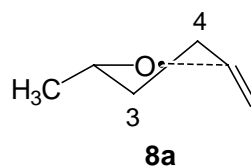

Standard orientation:

| Center Number | Atomic Number | Atomic Type | Coordinates (Angstroms) |           |           |
|---------------|---------------|-------------|-------------------------|-----------|-----------|
|               |               |             | X                       | Y         | Z         |
| 1             | 8             | 0           | -0.289466               | -1.017797 | -0.629575 |
| 2             | 6             | 0           | -1.149919               | 0.058462  | -0.377528 |
| 3             | 6             | 0           | -0.367540               | 1.121768  | 0.423222  |
| 4             | 6             | 0           | 1.021863                | 1.239835  | -0.221155 |
| 5             | 6             | 0           | 1.598680                | -0.149522 | -0.385618 |
| 6             | 6             | 0           | 2.022275                | -0.903348 | 0.679217  |
| 7             | 1             | 0           | -1.439566               | 0.520938  | -1.342063 |
| 8             | 1             | 0           | -0.272284               | 0.781987  | 1.462866  |
| 9             | 1             | 0           | -0.899717               | 2.081329  | 0.433095  |
| 10            | 1             | 0           | 1.681424                | 1.863478  | 0.396803  |
| 11            | 1             | 0           | 0.939851                | 1.726391  | -1.200027 |
| 12            | 1             | 0           | 1.887315                | -0.462254 | -1.384433 |
| 13            | 1             | 0           | 1.855809                | -0.585021 | 1.705674  |
| 14            | 1             | 0           | 2.464916                | -1.883639 | 0.532899  |
| 15            | 6             | 0           | -2.411796               | -0.415752 | 0.353295  |
| 16            | 1             | 0           | -2.148664               | -0.858348 | 1.321037  |
| 17            | 1             | 0           | -3.100405               | 0.423094  | 0.521218  |
| 18            | 1             | 0           | -2.934337               | -1.174238 | -0.239068 |

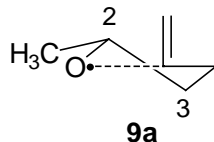

Standard orientation:

| Center Number | Atomic Number | Atomic Type | Coordinates (Angstroms) |           |           |
|---------------|---------------|-------------|-------------------------|-----------|-----------|
|               |               |             | X                       | Y         | Z         |
| 1             | 8             | 0           | -0.231051               | -1.091617 | -0.290604 |
| 2             | 6             | 0           | -1.040899               | -0.154616 | 0.363930  |
| 3             | 6             | 0           | -0.593118               | 1.243755  | -0.083935 |
| 4             | 6             | 0           | 0.936842                | 1.268627  | 0.081694  |
| 5             | 6             | 0           | 1.521466                | -0.019231 | -0.446635 |
| 6             | 6             | 0           | 2.337583                | -0.831873 | 0.303392  |
| 7             | 1             | 0           | -0.929368               | -0.238175 | 1.461921  |
| 8             | 1             | 0           | -1.075804               | 2.043794  | 0.492551  |
| 9             | 1             | 0           | -0.860262               | 1.380061  | -1.140598 |
| 10            | 1             | 0           | 1.198519                | 1.380937  | 1.142022  |
| 11            | 1             | 0           | 1.372738                | 2.123961  | -0.452050 |
| 12            | 1             | 0           | 1.514158                | -0.152135 | -1.525254 |
| 13            | 1             | 0           | 2.450443                | -0.681616 | 1.374431  |
| 14            | 1             | 0           | 2.817606                | -1.704556 | -0.129003 |
| 15            | 6             | 0           | -2.502931               | -0.469969 | 0.005516  |
| 16            | 1             | 0           | -2.766237               | -1.483030 | 0.325372  |
| 17            | 1             | 0           | -3.171470               | 0.239848  | 0.508570  |
| 18            | 1             | 0           | -2.655584               | -0.396312 | -1.076894 |

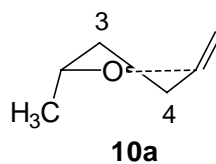

Standard orientation:

| Center Number | Atomic Number | Atomic Type | Coordinates (Angstroms) |           |           |
|---------------|---------------|-------------|-------------------------|-----------|-----------|
|               |               |             | X                       | Y         | Z         |
| 1             | 8             | 0           | -0.183614               | -1.261721 | 0.086115  |
| 2             | 6             | 0           | -1.108443               | -0.306771 | 0.528338  |
| 3             | 6             | 0           | -0.363564               | 1.042343  | 0.694312  |
| 4             | 6             | 0           | 0.608308                | 1.194128  | -0.489044 |
| 5             | 6             | 0           | 1.393330                | -0.088749 | -0.640376 |
| 6             | 6             | 0           | 2.348700                | -0.482524 | 0.261260  |
| 7             | 1             | 0           | -1.482910               | -0.607778 | 1.522868  |
| 8             | 1             | 0           | 0.205335                | 1.016469  | 1.631444  |
| 9             | 1             | 0           | -1.067555               | 1.881485  | 0.758241  |
| 10            | 1             | 0           | 1.282425                | 2.042859  | -0.313471 |
| 11            | 1             | 0           | 0.059308                | 1.406603  | -1.412223 |
| 12            | 1             | 0           | 1.349036                | -0.598588 | -1.598011 |
| 13            | 1             | 0           | 2.507504                | 0.052767  | 1.194481  |
| 14            | 1             | 0           | 2.922438                | -1.391686 | 0.111067  |
| 15            | 6             | 0           | -2.296953               | -0.212268 | -0.442604 |
| 16            | 1             | 0           | -2.745175               | -1.201774 | -0.582022 |
| 17            | 1             | 0           | -3.068122               | 0.461765  | -0.046346 |
| 18            | 1             | 0           | -1.981646               | 0.154686  | -1.426260 |

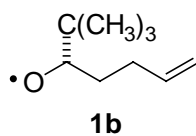

Standard orientation:

| Center<br>Number | Atomic<br>Number | Atomic<br>Type | Coordinates (Angstroms) |           |           |
|------------------|------------------|----------------|-------------------------|-----------|-----------|
|                  |                  |                | X                       | Y         | Z         |
| 1                | 8                | 0              | 0.584819                | -1.826832 | -0.037254 |
| 2                | 6                | 0              | 0.525777                | -0.501699 | -0.377588 |
| 3                | 6                | 0              | -0.796571               | 0.018350  | 0.302804  |
| 4                | 6                | 0              | -2.075068               | -0.557689 | -0.329887 |
| 5                | 6                | 0              | -3.313206               | -0.060049 | 0.366974  |
| 6                | 6                | 0              | -4.268443               | 0.687576  | -0.195967 |
| 7                | 6                | 0              | 1.819035                | 0.293579  | -0.004303 |
| 8                | 6                | 0              | 2.036261                | 0.323862  | 1.519141  |
| 9                | 6                | 0              | 3.003280                | -0.435928 | -0.675025 |
| 10               | 6                | 0              | 1.740267                | 1.726878  | -0.563661 |
| 11               | 1                | 0              | 0.351960                | -0.409557 | -1.469070 |
| 12               | 1                | 0              | -0.757953               | -0.223310 | 1.370487  |
| 13               | 1                | 0              | -0.794563               | 1.110116  | 0.212863  |
| 14               | 1                | 0              | -2.115724               | -0.288458 | -1.393660 |
| 15               | 1                | 0              | -2.034365               | -1.653355 | -0.276905 |
| 16               | 1                | 0              | -3.413236               | -0.340044 | 1.417850  |
| 17               | 1                | 0              | -5.140762               | 1.016658  | 0.363253  |
| 18               | 1                | 0              | -4.215599               | 0.991353  | -1.240450 |
| 19               | 1                | 0              | 3.008134                | 0.774405  | 1.756003  |
| 20               | 1                | 0              | 1.268017                | 0.915592  | 2.031268  |
| 21               | 1                | 0              | 2.024055                | -0.689493 | 1.936110  |
| 22               | 1                | 0              | 3.946033                | 0.083922  | -0.464448 |
| 23               | 1                | 0              | 3.089719                | -1.464039 | -0.306091 |
| 24               | 1                | 0              | 2.879864                | -0.476118 | -1.765499 |
| 25               | 1                | 0              | 2.701322                | 2.238083  | -0.427289 |
| 26               | 1                | 0              | 1.519261                | 1.726410  | -1.639519 |
| 27               | 1                | 0              | 0.977289                | 2.333216  | -0.061797 |

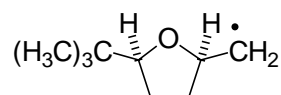

**cis-2b**

Standard orientation:

| Center Number | Atomic Number | Atomic Type | Coordinates (Angstroms) |           |           |
|---------------|---------------|-------------|-------------------------|-----------|-----------|
|               |               |             | X                       | Y         | Z         |
| 1             | 8             | 0           | 0.788641                | -0.782518 | -0.232074 |
| 2             | 6             | 0           | -0.173189               | 0.233281  | -0.549608 |
| 3             | 6             | 0           | 0.466210                | 1.573498  | -0.082046 |
| 4             | 6             | 0           | 1.935983                | 1.208476  | 0.229325  |
| 5             | 6             | 0           | 2.089336                | -0.208560 | -0.392279 |
| 6             | 6             | 0           | -1.553114               | -0.152021 | 0.035289  |
| 7             | 6             | 0           | -1.991668               | -1.496366 | -0.582670 |
| 8             | 6             | 0           | -2.572778               | 0.936864  | -0.356252 |
| 9             | 6             | 0           | -1.500096               | -0.295594 | 1.568469  |
| 10            | 1             | 0           | -0.279081               | 0.262659  | -1.648729 |
| 11            | 1             | 0           | -0.031366               | 1.981075  | 0.802656  |
| 12            | 1             | 0           | 0.391763                | 2.328769  | -0.871657 |
| 13            | 1             | 0           | 2.104812                | 1.147375  | 1.309809  |
| 14            | 1             | 0           | 2.659954                | 1.917195  | -0.185872 |
| 15            | 6             | 0           | 3.111748                | -1.079697 | 0.234387  |
| 16            | 1             | 0           | 2.302611                | -0.094902 | -1.471963 |
| 17            | 1             | 0           | -2.987386               | -1.779797 | -0.218364 |
| 18            | 1             | 0           | -2.042299               | -1.430329 | -1.677412 |
| 19            | 1             | 0           | -1.290120               | -2.296209 | -0.326170 |
| 20            | 1             | 0           | -3.576735               | 0.658335  | -0.013205 |
| 21            | 1             | 0           | -2.329139               | 1.908554  | 0.090321  |
| 22            | 1             | 0           | -2.619598               | 1.068111  | -1.445474 |
| 23            | 1             | 0           | -2.483274               | -0.594160 | 1.953266  |
| 24            | 1             | 0           | -0.772029               | -1.057362 | 1.864742  |
| 25            | 1             | 0           | -1.229553               | 0.645181  | 2.062937  |
| 26            | 1             | 0           | 4.138191                | -1.070618 | -0.116810 |
| 27            | 1             | 0           | 2.859533                | -1.653026 | 1.120827  |



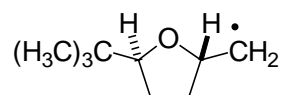

**trans-2b**

Standard orientation:

| Center Number | Atomic Number | Atomic Type | Coordinates (Angstroms) |           |           |
|---------------|---------------|-------------|-------------------------|-----------|-----------|
|               |               |             | X                       | Y         | Z         |
| 1             | 8             | 0           | 0.795109                | -0.812544 | -0.135769 |
| 2             | 6             | 0           | -0.147635               | 0.204610  | -0.513974 |
| 3             | 6             | 0           | 0.476647                | 1.537517  | -0.049190 |
| 4             | 6             | 0           | 1.980505                | 1.229819  | -0.106945 |
| 5             | 6             | 0           | 2.015207                | -0.247162 | 0.358823  |
| 6             | 6             | 0           | -1.566177               | -0.143486 | 0.007127  |
| 7             | 6             | 0           | -2.008041               | -1.475989 | -0.636584 |
| 8             | 6             | 0           | -2.540189               | 0.973086  | -0.422039 |
| 9             | 6             | 0           | -1.587479               | -0.296585 | 1.540858  |
| 10            | 1             | 0           | -0.204396               | 0.213796  | -1.615874 |
| 11            | 1             | 0           | 0.178674                | 1.778865  | 0.978076  |
| 12            | 1             | 0           | 0.185258                | 2.376521  | -0.688795 |
| 13            | 1             | 0           | 2.591959                | 1.881540  | 0.525660  |
| 14            | 1             | 0           | 2.354142                | 1.305035  | -1.135714 |
| 15            | 1             | 0           | 1.995729                | -0.262607 | 1.463444  |
| 16            | 6             | 0           | 3.183686                | -1.040264 | -0.111263 |
| 17            | 1             | 0           | -3.020044               | -1.746077 | -0.309185 |
| 18            | 1             | 0           | -2.020063               | -1.401383 | -1.731980 |
| 19            | 1             | 0           | -1.328965               | -2.289540 | -0.361670 |
| 20            | 1             | 0           | -3.568291               | 0.710600  | -0.144016 |
| 21            | 1             | 0           | -2.301534               | 1.930121  | 0.058104  |
| 22            | 1             | 0           | -2.520493               | 1.126198  | -1.509334 |
| 23            | 1             | 0           | -2.588956               | -0.594838 | 1.875427  |
| 24            | 1             | 0           | -0.878920               | -1.065590 | 1.866829  |
| 25            | 1             | 0           | -1.339516               | 0.639873  | 2.054970  |
| 26            | 1             | 0           | 4.121109                | -1.017465 | 0.436961  |
| 27            | 1             | 0           | 3.144292                | -1.533968 | -1.077639 |

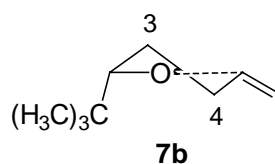

Standard orientation:

| Center Number | Atomic Number | Atomic Type | Coordinates (Angstroms) |           |           |
|---------------|---------------|-------------|-------------------------|-----------|-----------|
|               |               |             | X                       | Y         | Z         |
| 1             | 8             | 0           | 0.641305                | -0.606561 | -1.174437 |
| 2             | 6             | 0           | -0.278616               | 0.373566  | -0.795507 |
| 3             | 6             | 0           | 0.529706                | 1.603301  | -0.296537 |
| 4             | 6             | 0           | 1.752767                | 1.110211  | 0.500362  |
| 5             | 6             | 0           | 2.373974                | -0.074310 | -0.189374 |
| 6             | 6             | 0           | 2.682009                | -1.243148 | 0.464772  |
| 7             | 1             | 0           | -0.761370               | 0.683795  | -1.744851 |
| 8             | 1             | 0           | -0.076157               | 2.301791  | 0.291155  |
| 9             | 1             | 0           | 0.882859                | 2.151218  | -1.178728 |
| 10            | 1             | 0           | 1.476342                | 0.837257  | 1.524028  |
| 11            | 1             | 0           | 2.490906                | 1.921369  | 0.573939  |
| 12            | 1             | 0           | 2.844665                | 0.113658  | -1.150641 |
| 13            | 1             | 0           | 2.325740                | -1.436194 | 1.473315  |
| 14            | 1             | 0           | 3.217957                | -2.045143 | -0.034186 |
| 15            | 6             | 0           | -1.448556               | -0.148735 | 0.105806  |
| 16            | 6             | 0           | -0.985448               | -0.555165 | 1.516187  |
| 17            | 1             | 0           | -1.818281               | -1.002355 | 2.073983  |
| 18            | 1             | 0           | -0.181416               | -1.297374 | 1.467807  |
| 19            | 1             | 0           | -0.632812               | 0.305469  | 2.097313  |
| 20            | 6             | 0           | -2.534303               | 0.941280  | 0.216840  |
| 21            | 1             | 0           | -3.410641               | 0.553653  | 0.751484  |
| 22            | 1             | 0           | -2.183631               | 1.824379  | 0.764086  |
| 23            | 1             | 0           | -2.873088               | 1.272059  | -0.774045 |
| 24            | 6             | 0           | -2.056634               | -1.382286 | -0.593354 |
| 25            | 1             | 0           | -2.904053               | -1.773047 | -0.015503 |
| 26            | 1             | 0           | -2.424242               | -1.128869 | -1.596692 |
| 27            | 1             | 0           | -1.312615               | -2.177468 | -0.702137 |

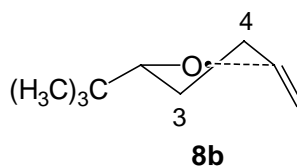

Standard orientation:

| Center Number | Atomic Number | Atomic Type | Coordinates (Angstroms) |           |           |
|---------------|---------------|-------------|-------------------------|-----------|-----------|
|               |               |             | X                       | Y         | Z         |
| 1             | 8             | 0           | 0.578704                | -0.838177 | -0.822249 |
| 2             | 6             | 0           | -0.182100               | 0.302127  | -0.543815 |
| 3             | 6             | 0           | 0.678952                | 1.251358  | 0.326036  |
| 4             | 6             | 0           | 2.108300                | 1.202656  | -0.234222 |
| 5             | 6             | 0           | 2.535711                | -0.241593 | -0.363453 |
| 6             | 6             | 0           | 2.750323                | -1.052956 | 0.720015  |
| 7             | 1             | 0           | -0.368510               | 0.836969  | -1.498316 |
| 8             | 1             | 0           | 0.677130                | 0.903689  | 1.365430  |
| 9             | 1             | 0           | 0.280110                | 2.271943  | 0.315595  |
| 10            | 1             | 0           | 2.794556                | 1.754035  | 0.422511  |
| 11            | 1             | 0           | 2.141371                | 1.687278  | -1.216812 |
| 12            | 1             | 0           | 2.882677                | -0.580278 | -1.334983 |
| 13            | 1             | 0           | 2.516199                | -0.730394 | 1.731736  |
| 14            | 1             | 0           | 3.092437                | -2.075798 | 0.596410  |
| 15            | 6             | 0           | -1.579664               | -0.072450 | 0.053929  |
| 16            | 6             | 0           | -1.444233               | -0.864759 | 1.366458  |
| 17            | 1             | 0           | -2.431367               | -1.203185 | 1.706045  |
| 18            | 1             | 0           | -0.810400               | -1.745878 | 1.223375  |
| 19            | 1             | 0           | -1.014094               | -0.259899 | 2.173983  |
| 20            | 6             | 0           | -2.397605               | 1.211842  | 0.292392  |
| 21            | 1             | 0           | -3.424894               | 0.960351  | 0.584789  |
| 22            | 1             | 0           | -1.970278               | 1.829702  | 1.091248  |
| 23            | 1             | 0           | -2.455761               | 1.825676  | -0.616744 |
| 24            | 6             | 0           | -2.310637               | -0.947266 | -0.986484 |
| 25            | 1             | 0           | -3.313894               | -1.214890 | -0.631013 |
| 26            | 1             | 0           | -2.423665               | -0.416113 | -1.940907 |
| 27            | 1             | 0           | -1.755532               | -1.871544 | -1.179490 |

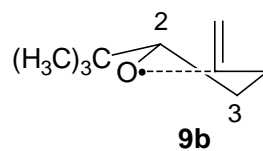

Standard orientation:

| Center Number | Atomic Number | Atomic Type | Coordinates (Angstroms) |           |           |
|---------------|---------------|-------------|-------------------------|-----------|-----------|
|               |               |             | X                       | Y         | Z         |
| 1             | 8             | 0           | -0.608987               | -0.956320 | 0.297487  |
| 2             | 6             | 0           | 0.095012                | 0.062624  | -0.348199 |
| 3             | 6             | 0           | -0.537696               | 1.399758  | 0.072749  |
| 4             | 6             | 0           | -2.052786               | 1.223607  | -0.140276 |
| 5             | 6             | 0           | -2.492138               | -0.111939 | 0.405854  |
| 6             | 6             | 0           | -3.184556               | -1.034478 | -0.339972 |
| 7             | 1             | 0           | 0.001828                | -0.035771 | -1.448183 |
| 8             | 1             | 0           | -0.157218               | 2.251689  | -0.503239 |
| 9             | 1             | 0           | -0.334176               | 1.589381  | 1.133378  |
| 10            | 1             | 0           | -2.290785               | 1.277398  | -1.210719 |
| 11            | 1             | 0           | -2.608304               | 2.031332  | 0.355829  |
| 12            | 1             | 0           | -2.489553               | -0.221763 | 1.487188  |
| 13            | 1             | 0           | -3.289483               | -0.922670 | -1.416507 |
| 14            | 1             | 0           | -3.565996               | -1.949069 | 0.103862  |
| 15            | 6             | 0           | 1.628976                | -0.111216 | -0.034162 |
| 16            | 6             | 0           | 2.079952                | -1.476805 | -0.591644 |
| 17            | 1             | 0           | 3.157222                | -1.616306 | -0.433614 |
| 18            | 1             | 0           | 1.549003                | -2.298760 | -0.101996 |
| 19            | 1             | 0           | 1.887775                | -1.546731 | -1.670228 |
| 20            | 6             | 0           | 2.412893                | 1.007073  | -0.748660 |
| 21            | 1             | 0           | 3.491350                | 0.836251  | -0.638948 |
| 22            | 1             | 0           | 2.189362                | 1.031759  | -1.823281 |
| 23            | 1             | 0           | 2.192466                | 1.996638  | -0.331735 |
| 24            | 6             | 0           | 1.910585                | -0.061937 | 1.479069  |
| 25            | 1             | 0           | 2.977476                | -0.239335 | 1.665559  |
| 26            | 1             | 0           | 1.661823                | 0.913767  | 1.912399  |
| 27            | 1             | 0           | 1.337655                | -0.827375 | 2.011785  |

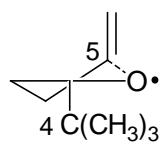

**10b**

Standard orientation:

| Center Number | Atomic Number | Atomic Type | Coordinates (Angstroms) |           |           |
|---------------|---------------|-------------|-------------------------|-----------|-----------|
|               |               |             | X                       | Y         | Z         |
| 1             | 8             | 0           | 0.591993                | 1.151158  | 0.075541  |
| 2             | 6             | 0           | -0.132195               | 0.178940  | -0.616471 |
| 3             | 6             | 0           | 0.689678                | -1.150249 | -0.627681 |
| 4             | 6             | 0           | 1.720049                | -1.137740 | 0.513274  |
| 5             | 6             | 0           | 2.438448                | 0.190155  | 0.544891  |
| 6             | 6             | 0           | 3.187305                | 0.676090  | -0.487333 |
| 7             | 1             | 0           | -0.283452               | 0.494499  | -1.664597 |
| 8             | 1             | 0           | 1.213908                | -1.216496 | -1.588808 |
| 9             | 1             | 0           | 0.048040                | -2.035817 | -0.564660 |
| 10            | 1             | 0           | 2.434161                | -1.961630 | 0.374456  |
| 11            | 1             | 0           | 1.226803                | -1.301566 | 1.475702  |
| 12            | 1             | 0           | 2.490380                | 0.705736  | 1.500085  |
| 13            | 1             | 0           | 3.235146                | 0.173411  | -1.450608 |
| 14            | 1             | 0           | 3.714125                | 1.621520  | -0.401493 |
| 15            | 6             | 0           | -1.575406               | 0.067789  | 0.010410  |
| 16            | 6             | 0           | -2.190566               | 1.482977  | 0.034812  |
| 17            | 1             | 0           | -3.225125               | 1.444636  | 0.399724  |
| 18            | 1             | 0           | -1.619016               | 2.151502  | 0.686559  |
| 19            | 1             | 0           | -2.204435               | 1.925211  | -0.969769 |
| 20            | 6             | 0           | -2.445167               | -0.830981 | -0.890500 |
| 21            | 1             | 0           | -3.478989               | -0.841512 | -0.522548 |
| 22            | 1             | 0           | -2.465580               | -0.461165 | -1.923721 |
| 23            | 1             | 0           | -2.095504               | -1.869934 | -0.910663 |
| 24            | 6             | 0           | -1.541490               | -0.496892 | 1.440703  |
| 25            | 1             | 0           | -2.550806               | -0.492052 | 1.872216  |
| 26            | 1             | 0           | -1.183570               | -1.533381 | 1.464273  |
| 27            | 1             | 0           | -0.895970               | 0.107243  | 2.086898  |

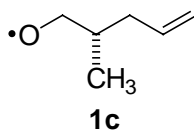

Standard orientation:

| Center Number | Atomic Number | Atomic Type | Coordinates (Angstroms) |           |           |
|---------------|---------------|-------------|-------------------------|-----------|-----------|
|               |               |             | X                       | Y         | Z         |
| 1             | 8             | 0           | -2.442545               | -1.196900 | -0.091623 |
| 2             | 6             | 0           | -1.952488               | 0.044870  | 0.216194  |
| 3             | 6             | 0           | -0.549520               | 0.374805  | -0.316976 |
| 4             | 6             | 0           | 0.485264                | -0.615697 | 0.266735  |
| 5             | 6             | 0           | 1.833839                | -0.544989 | -0.395126 |
| 6             | 6             | 0           | 2.990910                | -0.280490 | 0.220990  |
| 7             | 6             | 0           | -0.197166               | 1.839093  | -0.022522 |
| 8             | 1             | 0           | -2.703805               | 0.774602  | -0.156784 |
| 9             | 1             | 0           | -2.006567               | 0.166955  | 1.319846  |
| 10            | 1             | 0           | -0.582824               | 0.229884  | -1.407182 |
| 11            | 1             | 0           | 0.590745                | -0.441840 | 1.347876  |
| 12            | 1             | 0           | 0.079148                | -1.630634 | 0.142585  |
| 13            | 1             | 0           | 1.841973                | -0.737273 | -1.470439 |
| 14            | 1             | 0           | 3.934086                | -0.257951 | -0.319504 |
| 15            | 1             | 0           | 3.037331                | -0.083804 | 1.290972  |
| 16            | 1             | 0           | 0.798772                | 2.088957  | -0.402052 |
| 17            | 1             | 0           | -0.916835               | 2.525544  | -0.486836 |
| 18            | 1             | 0           | -0.196711               | 2.035211  | 1.058736  |

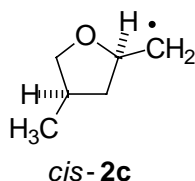

Standard orientation:

| Center Number | Atomic Number | Atomic Type | Coordinates (Angstroms) |           |           |
|---------------|---------------|-------------|-------------------------|-----------|-----------|
|               |               |             | X                       | Y         | Z         |
| 1             | 8             | 0           | -0.836320               | 1.184469  | -0.030105 |
| 2             | 6             | 0           | 0.589589                | 1.240775  | 0.116187  |
| 3             | 6             | 0           | 1.145612                | -0.107596 | -0.370900 |
| 4             | 6             | 0           | -0.030492               | -1.042676 | -0.048161 |
| 5             | 6             | 0           | -1.257094               | -0.155519 | -0.374050 |
| 6             | 1             | 0           | 0.833577                | 1.405186  | 1.177149  |
| 7             | 6             | 0           | 2.484752                | -0.498016 | 0.256270  |
| 8             | 1             | 0           | 1.262633                | -0.063428 | -1.463564 |
| 9             | 1             | 0           | -0.030939               | -1.303358 | 1.018754  |
| 10            | 1             | 0           | -0.027175               | -1.972045 | -0.627579 |
| 11            | 6             | 0           | -2.508995               | -0.496936 | 0.345149  |
| 12            | 1             | 0           | -1.436762               | -0.192525 | -1.462298 |
| 13            | 1             | 0           | 2.400610                | -0.573671 | 1.348122  |
| 14            | 1             | 0           | 2.833054                | -1.466458 | -0.122041 |
| 15            | 1             | 0           | 3.261533                | 0.243566  | 0.030543  |
| 16            | 1             | 0           | 0.967389                | 2.094432  | -0.459390 |
| 17            | 1             | 0           | -2.665394               | -0.133812 | 1.356192  |
| 18            | 1             | 0           | -3.248198               | -1.153825 | -0.102012 |

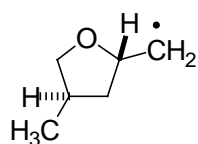

**trans-2c**

Standard orientation:

| Center Number | Atomic Number | Atomic Type | Coordinates (Angstroms) |           |           |
|---------------|---------------|-------------|-------------------------|-----------|-----------|
|               |               |             | X                       | Y         | Z         |
| 1             | 8             | 0           | -0.871035               | 1.203360  | 0.172816  |
| 2             | 6             | 0           | 0.541529                | 1.257574  | -0.037061 |
| 3             | 6             | 0           | 0.985062                | -0.172091 | -0.377905 |
| 4             | 6             | 0           | 0.019447                | -0.987150 | 0.500784  |
| 5             | 6             | 0           | -1.284470               | -0.148723 | 0.448990  |
| 6             | 1             | 0           | 1.042834                | 1.612289  | 0.880133  |
| 7             | 6             | 0           | 2.469961                | -0.447945 | -0.140820 |
| 8             | 1             | 0           | 0.743572                | -0.365404 | -1.432994 |
| 9             | 1             | 0           | 0.400331                | -1.033971 | 1.530394  |
| 10            | 1             | 0           | -0.127490               | -2.012726 | 0.146346  |
| 11            | 1             | 0           | -1.768374               | -0.146860 | 1.443399  |
| 12            | 6             | 0           | -2.268868               | -0.602234 | -0.577675 |
| 13            | 1             | 0           | 2.741474                | -0.274282 | 0.909125  |
| 14            | 1             | 0           | 2.723659                | -1.486743 | -0.385209 |
| 15            | 1             | 0           | 3.100628                | 0.201270  | -0.761888 |
| 16            | 1             | 0           | 0.738977                | 1.979239  | -0.838229 |
| 17            | 1             | 0           | -2.636526               | -1.625512 | -0.564702 |
| 18            | 1             | 0           | -2.766774               | 0.129241  | -1.206783 |

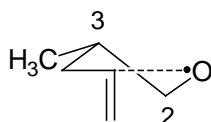

**7c**

Standard orientation:

| Center Number | Atomic Number | Atomic Type | Coordinates (Angstroms) |           |           |
|---------------|---------------|-------------|-------------------------|-----------|-----------|
|               |               |             | X                       | Y         | Z         |
| 1             | 8             | 0           | -0.752870               | 1.447430  | -0.213969 |
| 2             | 6             | 0           | 0.537031                | 1.231330  | 0.266098  |
| 3             | 6             | 0           | 1.099272                | -0.061833 | -0.345193 |
| 4             | 6             | 0           | -0.018994               | -1.103460 | -0.120269 |
| 5             | 6             | 0           | -1.364136               | -0.498385 | -0.434663 |
| 6             | 6             | 0           | -2.408747               | -0.498184 | 0.460819  |
| 7             | 1             | 0           | 0.573858                | 1.184938  | 1.371312  |
| 8             | 1             | 0           | 1.141096                | 2.102070  | -0.045444 |
| 9             | 1             | 0           | 1.198365                | 0.106113  | -1.427161 |
| 10            | 1             | 0           | -0.001814               | -1.441471 | 0.925214  |
| 11            | 1             | 0           | 0.151493                | -1.987347 | -0.750380 |
| 12            | 1             | 0           | -1.587207               | -0.320915 | -1.483310 |
| 13            | 1             | 0           | -2.255098               | -0.762218 | 1.504218  |
| 14            | 1             | 0           | -3.394403               | -0.141583 | 0.178248  |
| 15            | 6             | 0           | 2.452800                | -0.489282 | 0.225902  |
| 16            | 1             | 0           | 2.392975                | -0.648816 | 1.310703  |
| 17            | 1             | 0           | 2.800547                | -1.424473 | -0.229815 |
| 18            | 1             | 0           | 3.219798                | 0.273151  | 0.042001  |

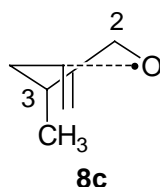

Standard orientation:

| Center Number | Atomic Number | Atomic Type | Coordinates (Angstroms) |           |           |
|---------------|---------------|-------------|-------------------------|-----------|-----------|
|               |               |             | X                       | Y         | Z         |
| 1             | 8             | 0           | 0.211700                | 1.415992  | -0.612622 |
| 2             | 6             | 0           | -0.988520               | 1.228492  | 0.067069  |
| 3             | 6             | 0           | -1.135532               | -0.260014 | 0.447219  |
| 4             | 6             | 0           | 0.210556                | -0.615423 | 1.137616  |
| 5             | 6             | 0           | 1.367713                | 0.061155  | 0.430530  |
| 6             | 6             | 0           | 2.081768                | -0.541091 | -0.580770 |
| 7             | 1             | 0           | -1.811359               | 1.526067  | -0.605969 |
| 8             | 1             | 0           | -1.046836               | 1.850282  | 0.980480  |
| 9             | 1             | 0           | -1.955018               | -0.369442 | 1.171586  |
| 10            | 1             | 0           | 0.351824                | -1.703538 | 1.148403  |
| 11            | 1             | 0           | 0.181564                | -0.283178 | 2.182062  |
| 12            | 1             | 0           | 1.825041                | 0.908801  | 0.932486  |
| 13            | 1             | 0           | 1.762733                | -1.482987 | -1.019899 |
| 14            | 1             | 0           | 2.941693                | -0.051409 | -1.027894 |
| 15            | 6             | 0           | -1.434588               | -1.143144 | -0.770644 |
| 16            | 1             | 0           | -0.678994               | -1.012340 | -1.552164 |
| 17            | 1             | 0           | -1.463318               | -2.203636 | -0.490681 |
| 18            | 1             | 0           | -2.409314               | -0.886418 | -1.203554 |

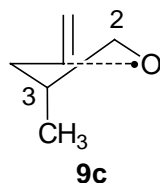

Standard orientation:

| Center Number | Atomic Number | Atomic Type | Coordinates (Angstroms) |           |           |
|---------------|---------------|-------------|-------------------------|-----------|-----------|
|               |               |             | X                       | Y         | Z         |
| 1             | 8             | 0           | -0.350121               | 1.349958  | -0.484694 |
| 2             | 6             | 0           | 0.590697                | 1.216031  | 0.536008  |
| 3             | 6             | 0           | 1.130822                | -0.225790 | 0.545667  |
| 4             | 6             | 0           | -0.151881               | -1.094852 | 0.539078  |
| 5             | 6             | 0           | -1.164534               | -0.534015 | -0.430820 |
| 6             | 6             | 0           | -2.445531               | -0.201673 | -0.055492 |
| 7             | 1             | 0           | 0.174040                | 1.482989  | 1.524126  |
| 8             | 1             | 0           | 1.397986                | 1.937143  | 0.315454  |
| 9             | 1             | 0           | 1.690573                | -0.411692 | 1.473697  |
| 10            | 1             | 0           | -0.589139               | -1.115403 | 1.545502  |
| 11            | 1             | 0           | 0.090716                | -2.131667 | 0.268740  |
| 12            | 1             | 0           | -0.961812               | -0.665943 | -1.489748 |
| 13            | 1             | 0           | -2.730521               | -0.152397 | 0.992740  |
| 14            | 1             | 0           | -3.184159               | 0.113684  | -0.786055 |
| 15            | 6             | 0           | 2.048600                | -0.511390 | -0.650881 |
| 16            | 1             | 0           | 2.962601                | 0.092500  | -0.593179 |
| 17            | 1             | 0           | 2.348451                | -1.566508 | -0.676610 |
| 18            | 1             | 0           | 1.553195                | -0.272241 | -1.598478 |



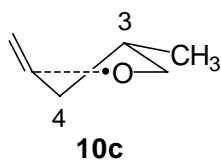

Standard orientation:

| Center Number | Atomic Number | Atomic Type | Coordinates (Angstroms) |           |           |
|---------------|---------------|-------------|-------------------------|-----------|-----------|
|               |               |             | X                       | Y         | Z         |
| 1             | 8             | 0           | 0.756964                | 1.499020  | 0.093401  |
| 2             | 6             | 0           | -0.618943               | 1.300038  | 0.015540  |
| 3             | 6             | 0           | -0.917136               | -0.177818 | -0.328516 |
| 4             | 6             | 0           | 0.023332                | -1.001071 | 0.575069  |
| 5             | 6             | 0           | 1.423467                | -0.438281 | 0.488340  |
| 6             | 6             | 0           | 2.218028                | -0.608096 | -0.618442 |
| 7             | 1             | 0           | -1.047131               | 1.948753  | -0.767041 |
| 8             | 1             | 0           | -1.106362               | 1.540305  | 0.979750  |
| 9             | 1             | 0           | -0.612312               | -0.334163 | -1.372756 |
| 10            | 1             | 0           | 0.010034                | -2.055996 | 0.270111  |
| 11            | 1             | 0           | -0.335332               | -0.958077 | 1.611206  |
| 12            | 1             | 0           | 1.889575                | -0.096891 | 1.407428  |
| 13            | 1             | 0           | 1.832867                | -1.051151 | -1.533870 |
| 14            | 1             | 0           | 3.234538                | -0.227862 | -0.644062 |
| 15            | 6             | 0           | -2.394145               | -0.546378 | -0.178210 |
| 16            | 1             | 0           | -3.025911               | 0.075707  | -0.824021 |
| 17            | 1             | 0           | -2.569576               | -1.593667 | -0.453163 |
| 18            | 1             | 0           | -2.733715               | -0.409483 | 0.856525  |

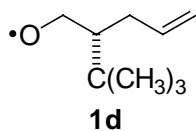

Standard orientation:

| Center Number | Atomic Number | Atomic Type | Coordinates (Angstroms) |           |           |
|---------------|---------------|-------------|-------------------------|-----------|-----------|
|               |               |             | X                       | Y         | Z         |
| 1             | 8             | 0           | -1.724896               | 1.776035  | -0.288750 |
| 2             | 6             | 0           | -0.523751               | 1.409650  | 0.275052  |
| 3             | 6             | 0           | 0.073052                | 0.126557  | -0.352421 |
| 4             | 6             | 0           | -0.886971               | -1.047278 | -0.016129 |
| 5             | 6             | 0           | -2.298349               | -0.778619 | -0.457046 |
| 6             | 6             | 0           | -3.357438               | -0.699384 | 0.363574  |
| 7             | 1             | 0           | 0.141363                | 2.269268  | 0.059962  |
| 8             | 1             | 0           | -0.594970               | 1.334176  | 1.374475  |
| 9             | 1             | 0           | 0.030849                | 0.280433  | -1.441087 |
| 10            | 6             | 0           | 1.577345                | -0.133550 | 0.004207  |
| 11            | 1             | 0           | -0.529750               | -1.956245 | -0.516953 |
| 12            | 1             | 0           | -0.874977               | -1.248563 | 1.062938  |
| 13            | 1             | 0           | -2.451013               | -0.644303 | -1.527827 |
| 14            | 1             | 0           | -4.355979               | -0.496400 | -0.013621 |
| 15            | 1             | 0           | -3.256116               | -0.819368 | 1.440799  |
| 16            | 6             | 0           | 2.067108                | -1.416061 | -0.705365 |
| 17            | 6             | 0           | 2.441147                | 1.039784  | -0.513091 |
| 18            | 6             | 0           | 1.809932                | -0.287782 | 1.523037  |
| 19            | 1             | 0           | 3.150472                | -1.529898 | -0.575273 |
| 20            | 1             | 0           | 1.596977                | -2.319858 | -0.303281 |
| 21            | 1             | 0           | 1.863865                | -1.378879 | -1.783709 |
| 22            | 1             | 0           | 3.506522                | 0.818008  | -0.374434 |
| 23            | 1             | 0           | 2.274205                | 1.216708  | -1.583511 |
| 24            | 1             | 0           | 2.237991                | 1.976294  | 0.019108  |
| 25            | 1             | 0           | 2.870896                | -0.484535 | 1.722544  |
| 26            | 1             | 0           | 1.537224                | 0.618828  | 2.075578  |
| 27            | 1             | 0           | 1.239158                | -1.123847 | 1.943391  |

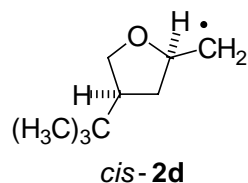

Standard orientation:

| Center Number | Atomic Number | Atomic Type | Coordinates (Angstroms) |           |           |
|---------------|---------------|-------------|-------------------------|-----------|-----------|
|               |               |             | X                       | Y         | Z         |
| 1             | 6             | 0           | -2.207815               | -0.185347 | -0.392097 |
| 2             | 8             | 0           | -1.927416               | 1.156432  | 0.048389  |
| 3             | 6             | 0           | -0.516682               | 1.415933  | -0.017157 |
| 4             | 6             | 0           | 0.171557                | 0.110425  | -0.483034 |
| 5             | 6             | 0           | -0.889015               | -0.948502 | -0.127093 |
| 6             | 6             | 0           | 1.624538                | -0.123597 | 0.027365  |
| 7             | 6             | 0           | -3.405724               | -0.704970 | 0.311175  |
| 8             | 1             | 0           | -0.189683               | 1.731881  | 0.981170  |
| 9             | 1             | 0           | 0.234699                | 0.147397  | -1.581399 |
| 10            | 1             | 0           | -0.841530               | -1.229598 | 0.931286  |
| 11            | 1             | 0           | -0.816361               | -1.859735 | -0.729011 |
| 12            | 1             | 0           | -2.394051               | -0.175695 | -1.481348 |
| 13            | 6             | 0           | 1.706624                | -0.280528 | 1.559865  |
| 14            | 6             | 0           | 2.185417                | -1.401712 | -0.630660 |
| 15            | 6             | 0           | 2.498715                | 1.075716  | -0.400716 |
| 16            | 1             | 0           | -0.339485               | 2.246613  | -0.711564 |
| 17            | 1             | 0           | -3.596461               | -0.409467 | 1.338010  |
| 18            | 1             | 0           | -4.055561               | -1.434208 | -0.161670 |
| 19            | 1             | 0           | 2.753685                | -0.395066 | 1.867096  |
| 20            | 1             | 0           | 1.305994                | 0.591095  | 2.089945  |
| 21            | 1             | 0           | 1.166080                | -1.166352 | 1.911870  |
| 22            | 1             | 0           | 3.230428                | -1.562543 | -0.336768 |
| 23            | 1             | 0           | 1.617746                | -2.291627 | -0.333824 |
| 24            | 1             | 0           | 2.154373                | -1.331891 | -1.725797 |
| 25            | 1             | 0           | 3.547550                | 0.908261  | -0.125488 |
| 26            | 1             | 0           | 2.459646                | 1.228381  | -1.487147 |
| 27            | 1             | 0           | 2.176568                | 2.006593  | 0.081632  |

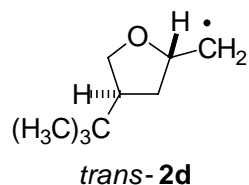

Standard orientation:

| Center Number | Atomic Number | Atomic Type | Coordinates (Angstroms) |           |           |
|---------------|---------------|-------------|-------------------------|-----------|-----------|
|               |               |             | X                       | Y         | Z         |
| 1             | 6             | 0           | -2.117920               | -0.187141 | 0.354117  |
| 2             | 8             | 0           | -1.926321               | 1.156370  | -0.109468 |
| 3             | 6             | 0           | -0.528182               | 1.413753  | -0.022336 |
| 4             | 6             | 0           | 0.169206                | 0.125308  | -0.520027 |
| 5             | 6             | 0           | -0.888864               | -0.974481 | -0.209968 |
| 6             | 6             | 0           | 1.616490                | -0.119874 | 0.002997  |
| 7             | 6             | 0           | -3.447876               | -0.684518 | -0.071030 |
| 8             | 1             | 0           | -0.257972               | 1.647889  | 1.020157  |
| 9             | 1             | 0           | 0.248373                | 0.208628  | -1.612196 |
| 10            | 1             | 0           | -0.545445               | -1.715379 | 0.518323  |
| 11            | 1             | 0           | -1.169163               | -1.515530 | -1.118797 |
| 12            | 1             | 0           | -2.053406               | -0.191923 | 1.457522  |
| 13            | 6             | 0           | 1.680484                | -0.321421 | 1.531640  |
| 14            | 6             | 0           | 2.191446                | -1.373807 | -0.688772 |
| 15            | 6             | 0           | 2.492540                | 1.094426  | -0.375804 |
| 16            | 1             | 0           | -0.320402               | 2.292298  | -0.638481 |
| 17            | 1             | 0           | -3.951173               | -1.466407 | 0.488048  |
| 18            | 1             | 0           | -3.874516               | -0.343577 | -1.009138 |
| 19            | 1             | 0           | 3.229555                | -1.547275 | -0.377735 |
| 20            | 1             | 0           | 1.616595                | -2.274014 | -0.440810 |
| 21            | 1             | 0           | 2.184256                | -1.261902 | -1.780730 |
| 22            | 1             | 0           | 3.538025                | 0.922635  | -0.090676 |
| 23            | 1             | 0           | 2.468341                | 1.278628  | -1.457769 |
| 24            | 1             | 0           | 2.160481                | 2.009772  | 0.129023  |
| 25            | 1             | 0           | 2.718730                | -0.491254 | 1.843168  |
| 26            | 1             | 0           | 1.315969                | 0.553640  | 2.081544  |
| 27            | 1             | 0           | 1.098378                | -1.190676 | 1.859393  |

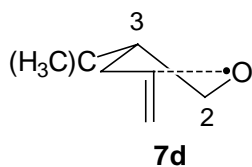

Standard orientation:

| Center Number | Atomic Number | Atomic Type | Coordinates (Angstroms) |           |           |
|---------------|---------------|-------------|-------------------------|-----------|-----------|
|               |               |             | X                       | Y         | Z         |
| 1             | 8             | 0           | -1.886650               | 1.440425  | -0.258605 |
| 2             | 6             | 0           | -0.579933               | 1.371123  | 0.220490  |
| 3             | 6             | 0           | 0.124863                | 0.150081  | -0.406293 |
| 4             | 6             | 0           | -0.861022               | -1.018225 | -0.153844 |
| 5             | 6             | 0           | -2.272217               | -0.582937 | -0.457016 |
| 6             | 6             | 0           | -3.297939               | -0.686824 | 0.449753  |
| 7             | 1             | 0           | -0.546475               | 1.336073  | 1.323426  |
| 8             | 1             | 0           | -0.093157               | 2.309867  | -0.093928 |
| 9             | 1             | 0           | 0.134731                | 0.333483  | -1.491662 |
| 10            | 1             | 0           | -0.801551               | -1.351992 | 0.889454  |
| 11            | 1             | 0           | -0.607303               | -1.878113 | -0.786353 |
| 12            | 1             | 0           | -2.523496               | -0.436287 | -1.504044 |
| 13            | 1             | 0           | -3.105284               | -0.918572 | 1.494557  |
| 14            | 1             | 0           | -4.321359               | -0.451551 | 0.174065  |
| 15            | 6             | 0           | 1.604617                | -0.104230 | 0.017829  |
| 16            | 6             | 0           | 1.762752                | -0.346971 | 1.534508  |
| 17            | 6             | 0           | 2.151271                | -1.333620 | -0.740419 |
| 18            | 6             | 0           | 2.459429                | 1.120960  | -0.377339 |
| 19            | 1             | 0           | 2.818530                | -0.522543 | 1.776982  |
| 20            | 1             | 0           | 1.202657                | -1.226192 | 1.873506  |
| 21            | 1             | 0           | 1.430507                | 0.513402  | 2.126428  |
| 22            | 1             | 0           | 2.032066                | -1.218026 | -1.825791 |
| 23            | 1             | 0           | 1.645299                | -2.258912 | -0.441653 |
| 24            | 1             | 0           | 3.221243                | -1.465695 | -0.535474 |
| 25            | 1             | 0           | 2.360400                | 1.346853  | -1.446970 |
| 26            | 1             | 0           | 3.520564                | 0.930253  | -0.173695 |
| 27            | 1             | 0           | 2.174901                | 2.018405  | 0.183973  |

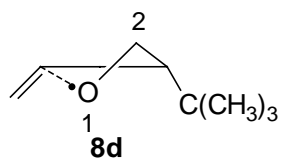

Standard orientation:

| Center Number | Atomic Number | Atomic Type | Coordinates (Angstroms) |           |           |
|---------------|---------------|-------------|-------------------------|-----------|-----------|
|               |               |             | X                       | Y         | Z         |
| 1             | 8             | 0           | -1.427953               | 1.378375  | 0.576635  |
| 2             | 6             | 0           | -0.471657               | 1.607945  | -0.403840 |
| 3             | 6             | 0           | 0.240122                | 0.298621  | -0.820716 |
| 4             | 6             | 0           | -0.911272               | -0.752328 | -0.996077 |
| 5             | 6             | 0           | -2.221650               | -0.303889 | -0.387225 |
| 6             | 6             | 0           | -2.852108               | -0.977059 | 0.625820  |
| 7             | 1             | 0           | -0.912797               | 2.078615  | -1.303886 |
| 8             | 1             | 0           | 0.243868                | 2.332390  | 0.016423  |
| 9             | 1             | 0           | 0.698273                | 0.483381  | -1.803433 |
| 10            | 6             | 0           | 1.416410                | -0.174646 | 0.099825  |
| 11            | 1             | 0           | -1.073634               | -0.934063 | -2.066228 |
| 12            | 1             | 0           | -0.629394               | -1.715151 | -0.560187 |
| 13            | 1             | 0           | -2.815086               | 0.398564  | -0.968054 |
| 14            | 1             | 0           | -3.835478               | -0.676303 | 0.974959  |
| 15            | 1             | 0           | -2.357432               | -1.779493 | 1.167921  |
| 16            | 6             | 0           | 0.958773                | -0.545467 | 1.525152  |
| 17            | 6             | 0           | 2.479011                | 0.943872  | 0.196711  |
| 18            | 6             | 0           | 2.099809                | -1.398985 | -0.551760 |
| 19            | 1             | 0           | 0.266685                | -1.395619 | 1.524057  |
| 20            | 1             | 0           | 0.451429                | 0.290128  | 2.015797  |
| 21            | 1             | 0           | 1.826447                | -0.833130 | 2.133221  |
| 22            | 1             | 0           | 2.123548                | 1.805783  | 0.772134  |
| 23            | 1             | 0           | 2.780144                | 1.299729  | -0.797665 |
| 24            | 1             | 0           | 3.378246                | 0.569201  | 0.701174  |
| 25            | 1             | 0           | 2.483615                | -1.155204 | -1.551358 |
| 26            | 1             | 0           | 1.421404                | -2.253688 | -0.653886 |
| 27            | 1             | 0           | 2.949158                | -1.730515 | 0.058589  |

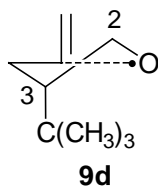

Standard orientation:

| Center Number | Atomic Number | Atomic Type | Coordinates (Angstroms) |           |           |
|---------------|---------------|-------------|-------------------------|-----------|-----------|
|               |               |             | X                       | Y         | Z         |
| 1             | 8             | 0           | 1.238141                | 1.281372  | 0.476232  |
| 2             | 6             | 0           | 0.461617                | 1.427513  | -0.673167 |
| 3             | 6             | 0           | -0.260214               | 0.108970  | -0.934835 |
| 4             | 6             | 0           | 0.865976                | -0.931538 | -0.817063 |
| 5             | 6             | 0           | 1.770824                | -0.551974 | 0.337235  |
| 6             | 6             | 0           | 3.163019                | -0.496952 | 0.176697  |
| 7             | 1             | 0           | 1.078490                | 1.703437  | -1.527131 |
| 8             | 1             | 0           | -0.228236               | 2.244589  | -0.476417 |
| 9             | 1             | 0           | -0.668096               | 0.101045  | -1.943131 |
| 10            | 1             | 0           | 1.445688                | -0.946555 | -1.735507 |
| 11            | 1             | 0           | 0.468620                | -1.932622 | -0.673401 |
| 12            | 1             | 0           | 1.413433                | -0.790949 | 1.321866  |
| 13            | 1             | 0           | 3.606302                | -0.420627 | -0.800555 |
| 14            | 1             | 0           | 3.809746                | -0.367396 | 1.024809  |
| 15            | 6             | 0           | -1.390890               | -0.143358 | 0.079960  |
| 16            | 6             | 0           | -1.996797               | -1.537775 | -0.165153 |
| 17            | 6             | 0           | -0.820350               | -0.074666 | 1.508616  |
| 18            | 6             | 0           | -2.482889               | 0.929315  | -0.089802 |
| 19            | 1             | 0           | -1.484014               | -2.277253 | 0.467307  |
| 20            | 1             | 0           | -1.869762               | -1.808836 | -1.223637 |
| 21            | 1             | 0           | -3.068638               | -1.511898 | 0.081234  |
| 22            | 1             | 0           | -1.544804               | -0.506985 | 2.214496  |
| 23            | 1             | 0           | -0.630263               | 0.975612  | 1.774666  |
| 24            | 1             | 0           | 0.122891                | -0.639373 | 1.546069  |
| 25            | 1             | 0           | -3.356958               | 0.663580  | 0.522710  |
| 26            | 1             | 0           | -2.778678               | 0.983222  | -1.147811 |
| 27            | 1             | 0           | -2.082624               | 1.902833  | 0.229651  |

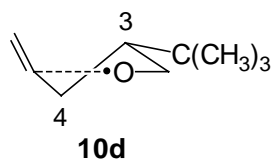

Standard orientation:

| Center Number | Atomic Number | Atomic Type | Coordinates (Angstroms) |           |           |
|---------------|---------------|-------------|-------------------------|-----------|-----------|
|               |               |             | X                       | Y         | Z         |
| 1             | 8             | 0           | 1.931584                | 1.467873  | 0.024134  |
| 2             | 6             | 0           | 0.539800                | 1.486576  | 0.001138  |
| 3             | 6             | 0           | -0.002846               | 0.044678  | -0.214886 |
| 4             | 6             | 0           | 0.864125                | -0.851783 | 0.698468  |
| 5             | 6             | 0           | 2.326054                | -0.565334 | 0.449434  |
| 6             | 6             | 0           | 2.963235                | -0.899713 | -0.714956 |
| 7             | 1             | 0           | 0.194614                | 2.132987  | -0.819898 |
| 8             | 1             | 0           | 0.149510                | 1.882375  | 0.956148  |
| 9             | 1             | 0           | 0.242691                | -0.212736 | -1.255775 |
| 10            | 1             | 0           | 0.651167                | -1.910995 | 0.509553  |
| 11            | 1             | 0           | 0.630041                | -0.655518 | 1.750412  |
| 12            | 1             | 0           | 2.932314                | -0.269022 | 1.299832  |
| 13            | 1             | 0           | 2.420869                | -1.292630 | -1.571886 |
| 14            | 1             | 0           | 4.024534                | -0.713391 | -0.847899 |
| 15            | 6             | 0           | -1.547970               | -0.123207 | -0.067398 |
| 16            | 6             | 0           | -1.952117               | -1.529960 | -0.563355 |
| 17            | 6             | 0           | -2.031720               | 0.046121  | 1.388417  |
| 18            | 6             | 0           | -2.264401               | 0.918506  | -0.955248 |
| 19            | 1             | 0           | -1.635848               | -1.691709 | -1.602092 |
| 20            | 1             | 0           | -3.042066               | -1.649904 | -0.525004 |
| 21            | 1             | 0           | -1.514760               | -2.325742 | 0.050377  |
| 22            | 1             | 0           | -1.630176               | -0.732265 | 2.047274  |
| 23            | 1             | 0           | -3.125811               | -0.024517 | 1.431112  |
| 24            | 1             | 0           | -1.750303               | 1.019998  | 1.805052  |
| 25            | 1             | 0           | -3.344843               | 0.728629  | -0.970055 |
| 26            | 1             | 0           | -1.904080               | 0.875709  | -1.991347 |
| 27            | 1             | 0           | -2.115488               | 1.940444  | -0.588554 |



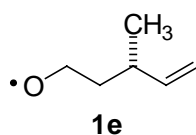

Standard orientation:

| Center Number | Atomic Number | Atomic Type | Coordinates (Angstroms) |           |           |
|---------------|---------------|-------------|-------------------------|-----------|-----------|
|               |               |             | X                       | Y         | Z         |
| 1             | 8             | 0           | -2.990727               | 0.198508  | 0.170637  |
| 2             | 6             | 0           | -1.703436               | 0.369488  | -0.260200 |
| 3             | 6             | 0           | -0.731795               | -0.751221 | 0.136124  |
| 4             | 6             | 0           | 0.729694                | -0.470631 | -0.281989 |
| 5             | 6             | 0           | 1.285046                | 0.727992  | 0.448819  |
| 6             | 6             | 0           | 1.721644                | 1.856917  | -0.119995 |
| 7             | 6             | 0           | 1.608866                | -1.712515 | -0.033755 |
| 8             | 1             | 0           | -1.674538               | 0.580740  | -1.346981 |
| 9             | 1             | 0           | -1.383666               | 1.325359  | 0.214902  |
| 10            | 1             | 0           | -0.792511               | -0.901111 | 1.222654  |
| 11            | 1             | 0           | -1.071203               | -1.684604 | -0.332066 |
| 12            | 1             | 0           | 0.745016                | -0.251672 | -1.360480 |
| 13            | 1             | 0           | 1.328423                | 0.633254  | 1.537243  |
| 14            | 1             | 0           | 2.119585                | 2.678121  | 0.471181  |
| 15            | 1             | 0           | 1.702029                | 1.998668  | -1.199552 |
| 16            | 1             | 0           | 2.639480                | -1.536175 | -0.360984 |
| 17            | 1             | 0           | 1.633587                | -1.969436 | 1.033168  |
| 18            | 1             | 0           | 1.219497                | -2.581388 | -0.578202 |

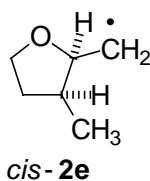

Standard orientation:

| Center Number | Atomic Number | Atomic Type | Coordinates (Angstroms) |           |           |
|---------------|---------------|-------------|-------------------------|-----------|-----------|
|               |               |             | X                       | Y         | Z         |
| 1             | 8             | 0           | -1.388195               | 0.738663  | -0.262009 |
| 2             | 6             | 0           | 0.031805                | 0.870207  | -0.475693 |
| 3             | 6             | 0           | 0.595291                | -0.592113 | -0.423469 |
| 4             | 6             | 0           | -0.421874               | -1.279261 | 0.500837  |
| 5             | 6             | 0           | -1.729242               | -0.615287 | 0.072265  |
| 6             | 1             | 0           | 0.183787                | 1.269343  | -1.492324 |
| 7             | 6             | 0           | 2.060303                | -0.734034 | -0.012751 |
| 8             | 1             | 0           | 0.472843                | -1.014410 | -1.431661 |
| 9             | 1             | 0           | -0.195537               | -1.052315 | 1.551014  |
| 10            | 1             | 0           | -0.438010               | -2.368569 | 0.381905  |
| 11            | 1             | 0           | -2.492716               | -0.586000 | 0.856798  |
| 12            | 1             | 0           | -2.157819               | -1.114654 | -0.810558 |
| 13            | 1             | 0           | 2.228550                | -0.358157 | 1.003154  |
| 14            | 1             | 0           | 2.366707                | -1.786804 | -0.040362 |
| 15            | 1             | 0           | 2.723070                | -0.180147 | -0.689682 |
| 16            | 6             | 0           | 0.599451                | 1.831260  | 0.510897  |
| 17            | 1             | 0           | 0.036080                | 2.098451  | 1.398231  |
| 18            | 1             | 0           | 1.564196                | 2.299331  | 0.337041  |

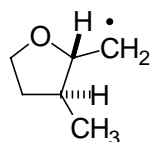

**trans-2e**

Standard orientation:

| Center Number | Atomic Number | Atomic Type | Coordinates (Angstroms) |           |           |
|---------------|---------------|-------------|-------------------------|-----------|-----------|
|               |               |             | X                       | Y         | Z         |
| 1             | 8             | 0           | 1.281458                | 0.845007  | -0.200147 |
| 2             | 6             | 0           | -0.151041               | 0.810230  | -0.347718 |
| 3             | 6             | 0           | -0.593420               | -0.511035 | 0.346005  |
| 4             | 6             | 0           | 0.595859                | -1.426125 | 0.012523  |
| 5             | 6             | 0           | 1.790624                | -0.467916 | 0.093073  |
| 6             | 6             | 0           | -0.742243               | 2.055645  | 0.198824  |
| 7             | 6             | 0           | -1.959739               | -1.029524 | -0.098170 |
| 8             | 1             | 0           | -0.608756               | -0.327565 | 1.429880  |
| 9             | 1             | 0           | 0.484488                | -1.826220 | -1.004337 |
| 10            | 1             | 0           | 0.688509                | -2.275442 | 0.698871  |
| 11            | 1             | 0           | 2.583626                | -0.706074 | -0.625773 |
| 12            | 1             | 0           | 2.231688                | -0.451719 | 1.099334  |
| 13            | 1             | 0           | -1.980532               | -1.210545 | -1.181047 |
| 14            | 1             | 0           | -2.203149               | -1.974251 | 0.402605  |
| 15            | 1             | 0           | -2.755090               | -0.313071 | 0.139830  |
| 16            | 1             | 0           | -0.396575               | 0.726235  | -1.422432 |
| 17            | 1             | 0           | -0.286109               | 2.535209  | 1.059087  |
| 18            | 1             | 0           | -1.650009               | 2.475742  | -0.222056 |

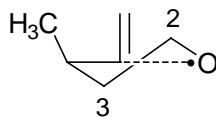

**7e**

Standard orientation:

| Center Number | Atomic Number | Atomic Type | Coordinates (Angstroms) |           |           |
|---------------|---------------|-------------|-------------------------|-----------|-----------|
|               |               |             | X                       | Y         | Z         |
| 1             | 8             | 0           | 0.908479                | -1.433244 | -0.215325 |
| 2             | 6             | 0           | 1.588831                | -0.258955 | -0.539404 |
| 3             | 6             | 0           | 1.218897                | 0.815209  | 0.489128  |
| 4             | 6             | 0           | -0.328591               | 0.813682  | 0.573730  |
| 5             | 6             | 0           | -0.765552               | -0.639872 | 0.640943  |
| 6             | 6             | 0           | -1.717767               | -1.215295 | -0.172112 |
| 7             | 1             | 0           | 1.375093                | 0.078467  | -1.569153 |
| 8             | 1             | 0           | 2.667303                | -0.490703 | -0.489923 |
| 9             | 1             | 0           | 1.608324                | 1.808241  | 0.228246  |
| 10            | 1             | 0           | 1.641827                | 0.531576  | 1.461110  |
| 11            | 6             | 0           | -0.973692               | 1.625207  | -0.559250 |
| 12            | 1             | 0           | -0.526264               | -1.150460 | 1.569781  |
| 13            | 1             | 0           | -2.086213               | -0.723968 | -1.066700 |
| 14            | 1             | 0           | -2.051871               | -2.233057 | 0.003519  |
| 15            | 1             | 0           | -0.618339               | 1.277688  | 1.528636  |
| 16            | 1             | 0           | -2.066234               | 1.635307  | -0.474114 |
| 17            | 1             | 0           | -0.626689               | 2.664022  | -0.518411 |
| 18            | 1             | 0           | -0.717527               | 1.228973  | -1.548600 |

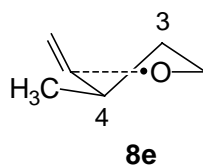

Standard orientation:

| Center Number | Atomic Number | Atomic Type | Coordinates (Angstroms) |           |           |
|---------------|---------------|-------------|-------------------------|-----------|-----------|
|               |               |             | X                       | Y         | Z         |
| 1             | 8             | 0           | 1.753935                | 0.504284  | -0.275901 |
| 2             | 6             | 0           | 1.675299                | -0.852624 | 0.054217  |
| 3             | 6             | 0           | 0.243933                | -1.185083 | 0.515270  |
| 4             | 6             | 0           | -0.715175               | -0.449126 | -0.438226 |
| 5             | 6             | 0           | -0.262362               | 0.999359  | -0.507661 |
| 6             | 6             | 0           | -0.331177               | 1.864461  | 0.554353  |
| 7             | 1             | 0           | 2.395247                | -1.093559 | 0.853122  |
| 8             | 1             | 0           | 1.914356                | -1.467385 | -0.832942 |
| 9             | 1             | 0           | 0.096570                | -0.826426 | 1.542418  |
| 10            | 1             | 0           | 0.067357                | -2.268589 | 0.514273  |
| 11            | 6             | 0           | -2.192241               | -0.608867 | -0.034716 |
| 12            | 1             | 0           | -0.086638               | 1.417680  | -1.494555 |
| 13            | 1             | 0           | -0.590177               | 1.531462  | 1.555826  |
| 14            | 1             | 0           | -0.042122               | 2.905071  | 0.445314  |
| 15            | 1             | 0           | -0.587109               | -0.881838 | -1.439756 |
| 16            | 1             | 0           | -2.376699               | -0.211329 | 0.970069  |
| 17            | 1             | 0           | -2.854384               | -0.080172 | -0.729730 |
| 18            | 1             | 0           | -2.477538               | -1.667911 | -0.036258 |

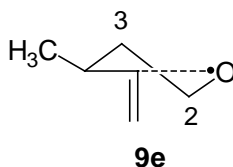

Standard orientation:

| Center Number | Atomic Number | Atomic Type | Coordinates (Angstroms) |           |           |
|---------------|---------------|-------------|-------------------------|-----------|-----------|
|               |               |             | X                       | Y         | Z         |
| 1             | 8             | 0           | 1.720482                | 0.109597  | -0.484772 |
| 2             | 6             | 0           | 1.469564                | -1.046233 | 0.257730  |
| 3             | 6             | 0           | 0.009518                | -1.451727 | 0.050596  |
| 4             | 6             | 0           | -0.822199               | -0.177895 | 0.313705  |
| 5             | 6             | 0           | -0.124733               | 0.990430  | -0.352465 |
| 6             | 6             | 0           | 0.235256                | 2.130697  | 0.327389  |
| 7             | 1             | 0           | 1.693179                | -0.909171 | 1.331461  |
| 8             | 1             | 0           | 2.158232                | -1.820634 | -0.123160 |
| 9             | 1             | 0           | -0.300948               | -2.275339 | 0.707510  |
| 10            | 1             | 0           | -0.132094               | -1.776692 | -0.989138 |
| 11            | 1             | 0           | -0.825311               | 0.007652  | 1.397837  |
| 12            | 1             | 0           | -0.194480               | 1.037557  | -1.436803 |
| 13            | 1             | 0           | 0.225958                | 2.164559  | 1.414221  |
| 14            | 1             | 0           | 0.633556                | 2.996555  | -0.192602 |
| 15            | 6             | 0           | -2.279172               | -0.316945 | -0.160832 |
| 16            | 1             | 0           | -2.324796               | -0.476884 | -1.245757 |
| 17            | 1             | 0           | -2.762196               | -1.173759 | 0.324026  |
| 18            | 1             | 0           | -2.864365               | 0.579421  | 0.073848  |

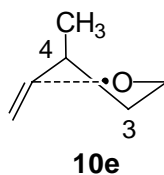

Standard orientation:

| Center Number | Atomic Number | Atomic Type | Coordinates (Angstroms) |           |           |
|---------------|---------------|-------------|-------------------------|-----------|-----------|
|               |               |             | X                       | Y         | Z         |
| 1             | 8             | 0           | -0.835361               | 1.146911  | -0.839178 |
| 2             | 6             | 0           | 0.221165                | 1.678264  | -0.098720 |
| 3             | 6             | 0           | 0.609851                | 0.686158  | 1.017160  |
| 4             | 6             | 0           | 0.576764                | -0.736294 | 0.415544  |
| 5             | 6             | 0           | -0.740970               | -0.879564 | -0.322660 |
| 6             | 6             | 0           | -1.950870               | -0.964508 | 0.317819  |
| 7             | 1             | 0           | -0.071655               | 2.640160  | 0.353275  |
| 8             | 1             | 0           | 1.093614                | 1.851816  | -0.753757 |
| 9             | 1             | 0           | -0.127642               | 0.759176  | 1.825297  |
| 10            | 1             | 0           | 1.593092                | 0.927103  | 1.442350  |
| 11            | 1             | 0           | 0.591138                | -1.454032 | 1.248866  |
| 12            | 1             | 0           | -0.695450               | -1.152106 | -1.373849 |
| 13            | 1             | 0           | -2.042434               | -0.810409 | 1.390445  |
| 14            | 1             | 0           | -2.871359               | -1.109704 | -0.239089 |
| 15            | 6             | 0           | 1.777047                | -1.032491 | -0.495142 |
| 16            | 1             | 0           | 2.720543                | -0.913652 | 0.050556  |
| 17            | 1             | 0           | 1.736581                | -2.061370 | -0.872953 |
| 18            | 1             | 0           | 1.798550                | -0.361665 | -1.361725 |

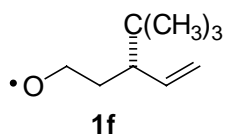

Standard orientation:

| Center Number | Atomic Number | Atomic Type | Coordinates (Angstroms) |           |           |
|---------------|---------------|-------------|-------------------------|-----------|-----------|
|               |               |             | X                       | Y         | Z         |
| 1             | 6             | 0           | -0.438775               | 2.711202  | -0.168484 |
| 2             | 6             | 0           | -0.146231               | 1.559986  | 0.446901  |
| 3             | 6             | 0           | 0.017385                | 0.218065  | -0.230079 |
| 4             | 6             | 0           | 1.450922                | -0.406294 | -0.033065 |
| 5             | 6             | 0           | 2.516271                | 0.630947  | -0.445569 |
| 6             | 6             | 0           | -1.135690               | -0.714549 | 0.221992  |
| 7             | 6             | 0           | -2.501086               | -0.269241 | -0.325515 |
| 8             | 8             | 0           | -3.566921               | -0.997341 | 0.124987  |
| 9             | 6             | 0           | 1.701418                | -0.830691 | 1.428736  |
| 10            | 6             | 0           | 1.612868                | -1.638680 | -0.949354 |
| 11            | 1             | 0           | -2.503835               | -0.202347 | -1.431164 |
| 12            | 1             | 0           | -2.718313               | 0.768941  | 0.016435  |
| 13            | 1             | 0           | -1.201051               | -0.747196 | 1.316333  |
| 14            | 1             | 0           | -0.089567               | 0.383088  | -1.314245 |
| 15            | 1             | 0           | -0.047500               | 1.562441  | 1.534420  |
| 16            | 1             | 0           | -0.566013               | 3.638534  | 0.385084  |
| 17            | 1             | 0           | -0.554566               | 2.770005  | -1.249859 |
| 18            | 1             | 0           | -0.959657               | -1.740791 | -0.117852 |
| 19            | 1             | 0           | 1.004830                | -1.611759 | 1.754198  |
| 20            | 1             | 0           | 1.612430                | 0.013899  | 2.122406  |
| 21            | 1             | 0           | 2.716811                | -1.232588 | 1.534720  |
| 22            | 1             | 0           | 0.940407                | -2.459029 | -0.676390 |
| 23            | 1             | 0           | 2.637240                | -2.025854 | -0.883616 |
| 24            | 1             | 0           | 1.423544                | -1.380684 | -1.999526 |
| 25            | 1             | 0           | 2.507127                | 1.509472  | 0.208097  |
| 26            | 1             | 0           | 2.352768                | 0.981660  | -1.472947 |
| 27            | 1             | 0           | 3.518222                | 0.186459  | -0.399365 |

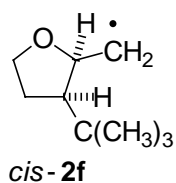

Standard orientation:

| Center<br>Number | Atomic<br>Number | Atomic<br>Type | Coordinates (Angstroms) |           |           |
|------------------|------------------|----------------|-------------------------|-----------|-----------|
|                  |                  |                | X                       | Y         | Z         |
| 1                | 8                | 0              | 2.397187                | 0.237203  | -0.455836 |
| 2                | 6                | 0              | 2.308363                | -1.122981 | -0.000260 |
| 3                | 6                | 0              | 0.884645                | -1.306109 | 0.527530  |
| 4                | 6                | 0              | 0.094070                | -0.343857 | -0.376437 |
| 5                | 6                | 0              | 1.091586                | 0.864577  | -0.474866 |
| 6                | 6                | 0              | -1.403181               | -0.082871 | -0.042977 |
| 7                | 6                | 0              | -1.647982               | 0.339097  | 1.420127  |
| 8                | 6                | 0              | -1.953131               | 1.008204  | -0.987363 |
| 9                | 6                | 0              | -2.191241               | -1.386776 | -0.307074 |
| 10               | 1                | 0              | 3.082273                | -1.284948 | 0.758634  |
| 11               | 1                | 0              | 2.509496                | -1.795175 | -0.847618 |
| 12               | 1                | 0              | 0.819274                | -1.002458 | 1.579001  |
| 13               | 1                | 0              | 0.547428                | -2.345074 | 0.452792  |
| 14               | 1                | 0              | 0.101232                | -0.784199 | -1.386240 |
| 15               | 6                | 0              | 1.041613                | 1.914543  | 0.581055  |
| 16               | 1                | 0              | 0.980867                | 1.341696  | -1.457391 |
| 17               | 1                | 0              | -2.717394               | 0.527504  | 1.580261  |
| 18               | 1                | 0              | -1.346164               | -0.444096 | 2.125345  |
| 19               | 1                | 0              | -1.104699               | 1.254195  | 1.678872  |
| 20               | 1                | 0              | -3.033871               | 1.132257  | -0.843773 |
| 21               | 1                | 0              | -1.482567               | 1.980801  | -0.804685 |
| 22               | 1                | 0              | -1.785934               | 0.744410  | -2.039960 |
| 23               | 1                | 0              | -3.262595               | -1.230386 | -0.129380 |
| 24               | 1                | 0              | -2.071103               | -1.723252 | -1.344949 |
| 25               | 1                | 0              | -1.863436               | -2.199746 | 0.351414  |
| 26               | 1                | 0              | 1.541189                | 1.756265  | 1.531559  |
| 27               | 1                | 0              | 0.560053                | 2.871613  | 0.404399  |

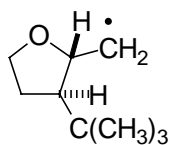

*trans-2f*

Standard orientation:

| Center Number | Atomic Number | Atomic Type | Coordinates (Angstroms) |           |           |
|---------------|---------------|-------------|-------------------------|-----------|-----------|
|               |               |             | X                       | Y         | Z         |
| 1             | 8             | 0           | 2.269149                | -0.005506 | 0.600317  |
| 2             | 6             | 0           | 2.205856                | -1.192783 | -0.189879 |
| 3             | 6             | 0           | 0.719777                | -1.528763 | -0.268236 |
| 4             | 6             | 0           | 0.075970                | -0.130822 | -0.412358 |
| 5             | 6             | 0           | 1.083535                | 0.808639  | 0.327388  |
| 6             | 6             | 0           | -1.418235               | -0.003769 | 0.015721  |
| 7             | 6             | 0           | -1.652119               | -0.354728 | 1.500171  |
| 8             | 6             | 0           | -1.900699               | 1.440873  | -0.236385 |
| 9             | 6             | 0           | -2.263544               | -0.958401 | -0.855304 |
| 10            | 1             | 0           | 2.630140                | -1.015869 | -1.192302 |
| 11            | 1             | 0           | 2.813661                | -1.951704 | 0.312440  |
| 12            | 1             | 0           | 0.479051                | -2.191905 | -1.106076 |
| 13            | 1             | 0           | 0.403136                | -2.019899 | 0.658632  |
| 14            | 1             | 0           | 0.109616                | 0.136314  | -1.479310 |
| 15            | 1             | 0           | 0.709994                | 1.102989  | 1.312943  |
| 16            | 6             | 0           | 1.477133                | 2.019186  | -0.446089 |
| 17            | 1             | 0           | -1.382822               | -1.392287 | 1.727130  |
| 18            | 1             | 0           | -2.713900               | -0.232406 | 1.748173  |
| 19            | 1             | 0           | -1.084270               | 0.294851  | 2.175887  |
| 20            | 1             | 0           | -1.755901               | 1.731730  | -1.284584 |
| 21            | 1             | 0           | -1.362219               | 2.165467  | 0.385610  |
| 22            | 1             | 0           | -2.969611               | 1.535018  | -0.006017 |
| 23            | 1             | 0           | -2.003661               | -2.008551 | -0.677151 |
| 24            | 1             | 0           | -2.121484               | -0.751981 | -1.924226 |
| 25            | 1             | 0           | -3.331564               | -0.839775 | -0.632711 |
| 26            | 1             | 0           | 1.667598                | 2.965823  | 0.050681  |
| 27            | 1             | 0           | 1.792991                | 1.919640  | -1.481832 |

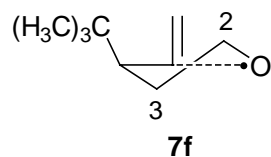

Standard orientation:

| Center Number | Atomic Number | Atomic Type | Coordinates (Angstroms) |           |           |
|---------------|---------------|-------------|-------------------------|-----------|-----------|
|               |               |             | X                       | Y         | Z         |
| 1             | 8             | 0           | 2.617573                | 0.003812  | 0.055187  |
| 2             | 6             | 0           | 1.945291                | -1.134262 | 0.499858  |
| 3             | 6             | 0           | 0.820011                | -1.454080 | -0.485760 |
| 4             | 6             | 0           | 0.003844                | -0.144772 | -0.745681 |
| 5             | 6             | 0           | 1.003159                | 1.014377  | -0.686182 |
| 6             | 6             | 0           | 1.078397                | 2.040138  | 0.228945  |
| 7             | 1             | 0           | 1.569283                | -1.018893 | 1.530244  |
| 8             | 1             | 0           | 2.686267                | -1.953004 | 0.517662  |
| 9             | 1             | 0           | 0.185738                | -2.277694 | -0.139154 |
| 10            | 1             | 0           | 1.278359                | -1.774626 | -1.428998 |
| 11            | 6             | 0           | -1.351769               | -0.038676 | 0.046524  |
| 12            | 1             | 0           | 1.537027                | 1.170743  | -1.619815 |
| 13            | 1             | 0           | 0.546464                | 2.033636  | 1.172401  |
| 14            | 1             | 0           | 1.783866                | 2.850814  | 0.074468  |
| 15            | 1             | 0           | -0.307680               | -0.179606 | -1.799759 |
| 16            | 6             | 0           | -2.296736               | -1.146056 | -0.482179 |
| 17            | 6             | 0           | -1.207705               | -0.230538 | 1.571060  |
| 18            | 6             | 0           | -2.046308               | 1.309758  | -0.249457 |
| 19            | 1             | 0           | -2.466332               | -1.041401 | -1.561637 |
| 20            | 1             | 0           | -3.272263               | -1.078440 | 0.014556  |
| 21            | 1             | 0           | -1.908167               | -2.153695 | -0.300131 |
| 22            | 1             | 0           | -0.555912               | 0.514985  | 2.035795  |
| 23            | 1             | 0           | -0.807757               | -1.220419 | 1.817946  |
| 24            | 1             | 0           | -2.191431               | -0.149656 | 2.050903  |
| 25            | 1             | 0           | -2.142945               | 1.471845  | -1.330916 |
| 26            | 1             | 0           | -1.507178               | 2.165594  | 0.164708  |
| 27            | 1             | 0           | -3.057034               | 1.313981  | 0.177464  |



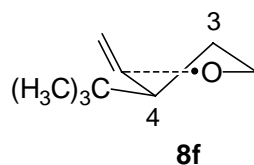

Standard orientation:

| Center Number | Atomic Number | Atomic Type | Coordinates (Angstroms) |           |           |
|---------------|---------------|-------------|-------------------------|-----------|-----------|
|               |               |             | X                       | Y         | Z         |
| 1             | 8             | 0           | 2.665412                | 0.064414  | -0.505343 |
| 2             | 6             | 0           | 2.310988                | -1.196473 | -0.006034 |
| 3             | 6             | 0           | 0.878590                | -1.151457 | 0.568279  |
| 4             | 6             | 0           | 0.070809                | -0.229854 | -0.364815 |
| 5             | 6             | 0           | 0.850670                | 1.071451  | -0.467995 |
| 6             | 6             | 0           | 1.200052                | 1.873589  | 0.589096  |
| 7             | 1             | 0           | 3.022023                | -1.526280 | 0.768033  |
| 8             | 1             | 0           | 2.335820                | -1.925017 | -0.836608 |
| 9             | 1             | 0           | 0.908424                | -0.746195 | 1.586271  |
| 10            | 1             | 0           | 0.458049                | -2.161246 | 0.630005  |
| 11            | 6             | 0           | -1.460802               | -0.081430 | -0.046819 |
| 12            | 1             | 0           | 0.968425                | 1.485702  | -1.465498 |
| 13            | 1             | 0           | 1.070734                | 1.567559  | 1.622189  |
| 14            | 1             | 0           | 1.716987                | 2.813393  | 0.420251  |
| 15            | 1             | 0           | 0.112923                | -0.682317 | -1.366126 |
| 16            | 6             | 0           | -2.140734               | -1.457692 | -0.217334 |
| 17            | 6             | 0           | -1.738456               | 0.434772  | 1.378464  |
| 18            | 6             | 0           | -2.088834               | 0.895673  | -1.064061 |
| 19            | 1             | 0           | -3.227408               | -1.360913 | -0.101563 |
| 20            | 1             | 0           | -1.796729               | -2.184173 | 0.527424  |
| 21            | 1             | 0           | -1.948831               | -1.877176 | -1.213402 |
| 22            | 1             | 0           | -1.324732               | 1.436247  | 1.537657  |
| 23            | 1             | 0           | -1.326034               | -0.233428 | 2.143794  |
| 24            | 1             | 0           | -2.820737               | 0.496735  | 1.548452  |
| 25            | 1             | 0           | -1.913006               | 0.564117  | -2.095933 |
| 26            | 1             | 0           | -1.678845               | 1.906607  | -0.958529 |
| 27            | 1             | 0           | -3.174065               | 0.959601  | -0.916361 |

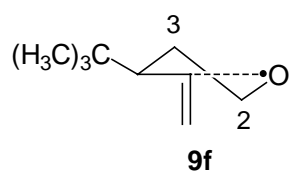

Standard orientation:

| Center Number | Atomic Number | Atomic Type | Coordinates (Angstroms) |           |           |
|---------------|---------------|-------------|-------------------------|-----------|-----------|
|               |               |             | X                       | Y         | Z         |
| 1             | 8             | 0           | -2.621721               | -0.081191 | 0.489791  |
| 2             | 6             | 0           | -2.256035               | -1.181003 | -0.287811 |
| 3             | 6             | 0           | -0.759835               | -1.438611 | -0.107366 |
| 4             | 6             | 0           | -0.062171               | -0.079061 | -0.360309 |
| 5             | 6             | 0           | -0.887875               | 1.000170  | 0.317419  |
| 6             | 6             | 0           | -1.412153               | 2.074165  | -0.362907 |
| 7             | 1             | 0           | -2.506578               | -1.038674 | -1.354994 |
| 8             | 1             | 0           | -2.852751               | -2.036380 | 0.074843  |
| 9             | 1             | 0           | -0.394077               | -2.214229 | -0.790864 |
| 10            | 1             | 0           | -0.579594               | -1.778603 | 0.919605  |
| 11            | 1             | 0           | -0.116396               | 0.110868  | -1.443651 |
| 12            | 1             | 0           | -0.823591               | 1.066890  | 1.399159  |
| 13            | 1             | 0           | -1.419690               | 2.105328  | -1.449834 |
| 14            | 1             | 0           | -1.922343               | 2.877726  | 0.159754  |
| 15            | 6             | 0           | 1.464439                | -0.036223 | 0.011418  |
| 16            | 6             | 0           | 1.713433                | -0.207813 | 1.524803  |
| 17            | 6             | 0           | 2.199903                | -1.164401 | -0.743113 |
| 18            | 6             | 0           | 2.060826                | 1.313738  | -0.440599 |
| 19            | 1             | 0           | 1.308127                | -1.151559 | 1.906706  |
| 20            | 1             | 0           | 1.277943                | 0.609326  | 2.111002  |
| 21            | 1             | 0           | 2.791991                | -0.210674 | 1.725634  |
| 22            | 1             | 0           | 3.283290                | -1.076618 | -0.594135 |
| 23            | 1             | 0           | 2.007993                | -1.113996 | -1.822934 |
| 24            | 1             | 0           | 1.900086                | -2.157962 | -0.391994 |
| 25            | 1             | 0           | 1.598515                | 2.159120  | 0.081086  |
| 26            | 1             | 0           | 1.918766                | 1.469247  | -1.518105 |
| 27            | 1             | 0           | 3.138888                | 1.343961  | -0.238814 |

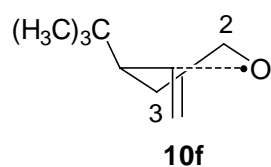

Standard orientation:

| Center Number | Atomic Number | Atomic Type | Coordinates (Angstroms) |           |           |
|---------------|---------------|-------------|-------------------------|-----------|-----------|
|               |               |             | X                       | Y         | Z         |
| 1             | 8             | 0           | -2.468037               | -0.337680 | 0.548008  |
| 2             | 6             | 0           | -1.753600               | -1.483710 | 0.206884  |
| 3             | 6             | 0           | -0.773709               | -1.147964 | -0.928117 |
| 4             | 6             | 0           | -0.018423               | 0.172867  | -0.585626 |
| 5             | 6             | 0           | -0.964858               | 1.050155  | 0.219400  |
| 6             | 6             | 0           | -1.714806               | 2.042919  | -0.364060 |
| 7             | 1             | 0           | -2.470842               | -2.243762 | -0.149067 |
| 8             | 1             | 0           | -1.216046               | -1.901766 | 1.074694  |
| 9             | 1             | 0           | -1.359009               | -0.980691 | -1.839883 |
| 10            | 1             | 0           | -0.093214               | -1.983870 | -1.127173 |
| 11            | 1             | 0           | 0.157923                | 0.690807  | -1.539210 |
| 12            | 1             | 0           | -0.833524               | 1.081479  | 1.296772  |
| 13            | 1             | 0           | -1.770760               | 2.147144  | -1.445207 |
| 14            | 1             | 0           | -2.352966               | 2.689563  | 0.230552  |
| 15            | 6             | 0           | 1.402464                | 0.013640  | 0.061235  |
| 16            | 6             | 0           | 1.385863                | -0.812304 | 1.363392  |
| 17            | 6             | 0           | 2.346918                | -0.671158 | -0.950502 |
| 18            | 6             | 0           | 1.975769                | 1.416211  | 0.363132  |
| 19            | 1             | 0           | 0.713877                | -0.386373 | 2.117640  |
| 20            | 1             | 0           | 2.391885                | -0.840889 | 1.800621  |
| 21            | 1             | 0           | 1.078213                | -1.848757 | 1.185416  |
| 22            | 1             | 0           | 2.401855                | -0.104783 | -1.889313 |
| 23            | 1             | 0           | 2.030252                | -1.691751 | -1.192272 |
| 24            | 1             | 0           | 3.362699                | -0.733542 | -0.540714 |
| 25            | 1             | 0           | 3.006708                | 1.336521  | 0.730098  |
| 26            | 1             | 0           | 1.394351                | 1.945471  | 1.126567  |
| 27            | 1             | 0           | 1.989178                | 2.042709  | -0.538004 |

## 8 B3LYP/6-31+G\*-Calculated Data of Methyl- and *tert*-Butyl-substituted Tetrahydropyrans – *A*-Value Analysis

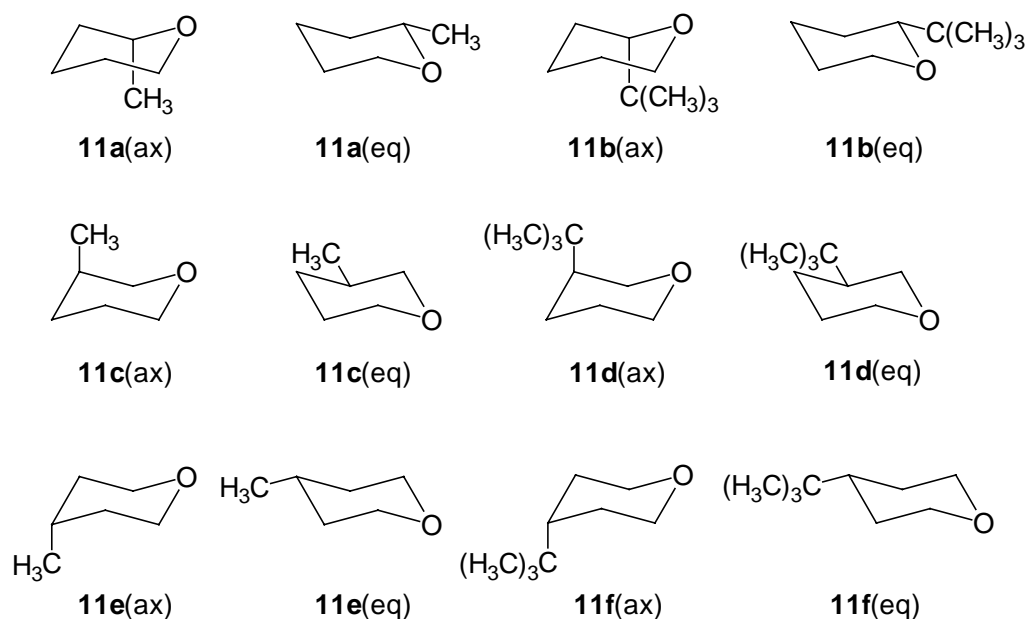

**Table 8.1.** B3LYP/6-31+G\*//B3LYP/6-31+G\*-calculated data for substituted tetrahydropyrans **11**

| <b>11</b>                                | data                         | <b>11(ax)</b> | <b>11(eq)</b> |
|------------------------------------------|------------------------------|---------------|---------------|
| <b>a</b><br>R <sup>1</sup> = Me          | <i>E</i> + ZPVE <sup>a</sup> | -310.920809   | -310.926521   |
|                                          | ZPVE <sup>b</sup>            | 459107.6      | 458168.3      |
|                                          | <i>G</i> <sup>d</sup>        | -310.951148   | -310.956932   |
|                                          | $\Delta G$ <sup>e</sup>      | 15.16         | $\equiv 0$    |
| <b>b</b><br>R <sup>1</sup> = <i>t</i> Bu | <i>E</i> + ZPVE <sup>a</sup> | -428.770279   | -428.781759   |
|                                          | ZPVE <sup>b</sup>            | 681770.1      | 680572.6      |
|                                          | <i>G</i> <sup>d</sup>        | -428.805572   | -428.817129   |
|                                          | $\Delta G$ <sup>e</sup>      | 30.34         | $\equiv 0$    |
| <b>c</b><br>R <sup>2</sup> = Me          | <i>E</i> + ZPVE <sup>a</sup> | -310.919279   | -310.922356   |
|                                          | ZPVE <sup>b</sup>            | 459303.8      | 458438.3      |
|                                          | <i>G</i> <sup>d</sup>        | -310.949651   | -310.952822   |
|                                          | $\Delta G$ <sup>e</sup>      | 8.32          | $\equiv 0$    |
| <b>d</b><br>R <sup>2</sup> = <i>t</i> Bu | <i>E</i> + ZPVE <sup>a</sup> | -428.768024   | -428.773941   |
|                                          | ZPVE <sup>b</sup>            | 682402.0      | 681109.1      |
|                                          | <i>G</i> <sup>d</sup>        | -428.803804   | -428.809968   |
|                                          | $\Delta G$ <sup>e</sup>      | 16.18         | $\equiv 0$    |
| <b>e</b><br>R <sup>3</sup> = Me          | <i>E</i> + ZPVE <sup>a</sup> | -310.918157   | -310.922578   |
|                                          | ZPVE <sup>b</sup>            | 459439.4      | 458557.8      |
|                                          | <i>G</i> <sup>d</sup>        | -310.948524   | -310.952995   |
|                                          | $\Delta G$ <sup>e</sup>      | 11.74         | $\equiv 0$    |
| <b>f</b><br>R <sup>3</sup> = <i>t</i> Bu | <i>E</i> + ZPVE <sup>a</sup> | -428.765212   | -428.775089   |
|                                          | ZPVE <sup>b</sup>            | 682449.1      | 680919.8      |
|                                          | <i>G</i> <sup>d</sup>        | -428.801116   | -428.811703   |
|                                          | $\Delta G$ <sup>e</sup>      | 27.79         | $\equiv 0$    |

**Table 8.2** *A*-value analysis of 2-, 3-, and 4- alkyl-substituted tetrahydropyrans **11**.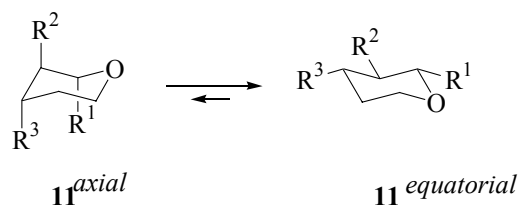

| <b>11</b> | R <sup>1</sup>                   | R <sup>2</sup>                   | R <sup>3</sup>                   | <i>A</i> <sup>calcd</sup> [kJ mol <sup>-1</sup> ] <sup>a</sup> | <i>A</i> <sup>exp</sup> [kJ mol <sup>-1</sup> ] <sup>b</sup> |
|-----------|----------------------------------|----------------------------------|----------------------------------|----------------------------------------------------------------|--------------------------------------------------------------|
| <b>a</b>  | CH <sub>3</sub>                  | H                                | H                                | 15.2                                                           | 12.0 ± 0.8                                                   |
| <b>b</b>  | C(CH <sub>3</sub> ) <sub>3</sub> | H                                | H                                | 30.3                                                           | – <sup>c</sup>                                               |
| <b>c</b>  | H                                | CH <sub>3</sub>                  | H                                | 8.3                                                            | 6.0 ± 0.2                                                    |
| <b>d</b>  | H                                | C(CH <sub>3</sub> ) <sub>3</sub> | H                                | 16.2                                                           | – <sup>c</sup>                                               |
| <b>e</b>  | H                                | H                                | CH <sub>3</sub>                  | 11.7                                                           | 8.2 ± 0.2                                                    |
| <b>f</b>  | H                                | H                                | C(CH <sub>3</sub> ) <sub>3</sub> | 27.8                                                           | – <sup>c</sup>                                               |

<sup>a</sup>  $A^{calcd} = -\Delta G^{298} = G^{298}_{ax} - G^{298}_{eq}$  (B3LYP/6-31+G\*// B3LYP/6-31+G\*). <sup>b</sup> Refers to the temperature range of 188–173 K. <sup>c</sup> Hitherto not reported.

**11a<sup>ax</sup>**

Standard orientation:

| Center<br>Number | Atomic<br>Number | Atomic<br>Type | Coordinates (Angstroms) |           |           |
|------------------|------------------|----------------|-------------------------|-----------|-----------|
|                  |                  |                | X                       | Y         | Z         |
| 1                | 8                | 0              | 0.288673                | -1.151218 | -0.686337 |
| 2                | 6                | 0              | 1.075337                | 0.039648  | -0.502157 |
| 3                | 6                | 0              | 0.183922                | 1.294400  | -0.563812 |
| 4                | 6                | 0              | -1.018748               | 1.199990  | 0.390160  |
| 5                | 6                | 0              | -1.772384               | -0.116908 | 0.150561  |
| 6                | 6                | 0              | -0.804446               | -1.299514 | 0.220177  |
| 7                | 1                | 0              | 1.739530                | 0.038034  | -1.373953 |
| 8                | 6                | 0              | 1.952541                | -0.039723 | 0.754495  |
| 9                | 1                | 0              | -0.186553               | 1.400617  | -1.592491 |
| 10               | 1                | 0              | 0.787100                | 2.185930  | -0.346172 |
| 11               | 1                | 0              | -1.684321               | 2.060109  | 0.243416  |
| 12               | 1                | 0              | -0.680387               | 1.244566  | 1.435419  |
| 13               | 1                | 0              | -2.242515               | -0.099413 | -0.842636 |
| 14               | 1                | 0              | -2.574091               | -0.253750 | 0.889127  |
| 15               | 1                | 0              | -1.293063               | -2.234172 | -0.072337 |
| 16               | 1                | 0              | -0.432729               | -1.426487 | 1.250403  |
| 17               | 1                | 0              | 2.521596                | -0.975844 | 0.754495  |
| 18               | 1                | 0              | 2.664650                | 0.794690  | 0.765486  |
| 19               | 1                | 0              | 1.374062                | 0.008108  | 1.683402  |

**11a<sup>eq</sup>**

Standard orientation:

| Center<br>Number | Atomic<br>Number | Atomic<br>Type | Coordinates (Angstroms) |           |           |
|------------------|------------------|----------------|-------------------------|-----------|-----------|
|                  |                  |                | X                       | Y         | Z         |
| 1                | 8                | 0              | -0.352190               | -1.160228 | -0.200728 |
| 2                | 6                | 0              | -0.977182               | 0.018802  | 0.324260  |
| 3                | 6                | 0              | -0.239262               | 1.278809  | -0.150100 |
| 4                | 6                | 0              | 1.255988                | 1.210985  | 0.200462  |
| 5                | 6                | 0              | 1.858870                | -0.111790 | -0.295975 |
| 6                | 6                | 0              | 1.013125                | -1.291160 | 0.188419  |
| 7                | 1                | 0              | -0.919388               | -0.028396 | 1.428235  |
| 8                | 6                | 0              | -2.437483               | -0.022870 | -0.103612 |
| 9                | 1                | 0              | -0.702752               | 2.166122  | 0.302150  |
| 10               | 1                | 0              | -0.363908               | 1.366064  | -1.239131 |
| 11               | 1                | 0              | 1.377224                | 1.278705  | 1.292393  |
| 12               | 1                | 0              | 1.791334                | 2.067680  | -0.228230 |
| 13               | 1                | 0              | 2.892730                | -0.229892 | 0.056256  |
| 14               | 1                | 0              | 1.884569                | -0.121214 | -1.394321 |
| 15               | 1                | 0              | 1.073930                | -1.375027 | 1.288592  |
| 16               | 1                | 0              | 1.355055                | -2.237270 | -0.242610 |
| 17               | 1                | 0              | -2.916168               | -0.941168 | 0.252761  |
| 18               | 1                | 0              | -2.982519               | 0.836040  | 0.305712  |
| 19               | 1                | 0              | -2.516916               | 0.003520  | -1.196715 |

**11b<sup>ax</sup>**

Standard orientation:

| Center<br>Number | Atomic<br>Number | Atomic<br>Type | Coordinates (Angstroms) |           |           |
|------------------|------------------|----------------|-------------------------|-----------|-----------|
|                  |                  |                | X                       | Y         | Z         |
| 1                | 8                | 0              | 0.646499                | 1.156473  | -0.782546 |
| 2                | 6                | 0              | -0.137830               | -0.051128 | -0.809760 |
| 3                | 6                | 0              | 0.763317                | -1.302987 | -0.687341 |
| 4                | 6                | 0              | 1.870712                | -1.195625 | 0.375856  |
| 5                | 6                | 0              | 2.635159                | 0.123383  | 0.212802  |
| 6                | 6                | 0              | 1.649234                | 1.288954  | 0.223779  |
| 7                | 1                | 0              | -0.531401               | -0.037523 | -1.833558 |
| 8                | 6                | 0              | -1.418506               | 0.001812  | 0.096459  |
| 9                | 1                | 0              | 1.247295                | -1.452160 | -1.662294 |
| 10               | 1                | 0              | 0.148081                | -2.192996 | -0.510488 |
| 11               | 1                | 0              | 2.550803                | -2.051966 | 0.279619  |
| 12               | 1                | 0              | 1.447328                | -1.245852 | 1.386832  |
| 13               | 1                | 0              | 3.182737                | 0.125643  | -0.740167 |
| 14               | 1                | 0              | 3.373142                | 0.255734  | 1.015615  |
| 15               | 1                | 0              | 2.148427                | 2.236793  | -0.003002 |
| 16               | 1                | 0              | 1.190909                | 1.386321  | 1.220492  |
| 17               | 6                | 0              | -2.051091               | 1.402911  | -0.028091 |
| 18               | 6                | 0              | -2.427358               | -1.034449 | -0.452246 |
| 19               | 6                | 0              | -1.180996               | -0.312555 | 1.589175  |
| 20               | 1                | 0              | -3.011998               | 1.432367  | 0.501382  |
| 21               | 1                | 0              | -1.402490               | 2.177103  | 0.392550  |
| 22               | 1                | 0              | -2.234872               | 1.664303  | -1.077658 |
| 23               | 1                | 0              | -3.363483               | -0.989600 | 0.117880  |
| 24               | 1                | 0              | -2.670481               | -0.838672 | -1.504425 |
| 25               | 1                | 0              | -2.050303               | -2.061613 | -0.379497 |
| 26               | 1                | 0              | -2.133674               | -0.260139 | 2.132232  |
| 27               | 1                | 0              | -0.778861               | -1.321340 | 1.737112  |
| 28               | 1                | 0              | -0.498994               | 0.399915  | 2.063958  |

**11b<sup>eq</sup>**

Standard orientation:

| Center<br>Number | Atomic<br>Number | Atomic<br>Type | Coordinates (Angstroms) |           |           |
|------------------|------------------|----------------|-------------------------|-----------|-----------|
|                  |                  |                | X                       | Y         | Z         |
| 1                | 8                | 0              | -0.559202               | -1.125565 | 0.182633  |
| 2                | 6                | 0              | 0.051093                | 0.059238  | -0.349025 |
| 3                | 6                | 0              | -0.716879               | 1.302238  | 0.131144  |
| 4                | 6                | 0              | -2.207235               | 1.196793  | -0.237374 |
| 5                | 6                | 0              | -2.792667               | -0.134122 | 0.254911  |
| 6                | 6                | 0              | -1.915792               | -1.294232 | -0.217419 |
| 7                | 1                | 0              | -0.033634               | 0.015257  | -1.452370 |
| 8                | 6                | 0              | 1.565827                | 0.004432  | -0.005878 |
| 9                | 1                | 0              | -0.287067               | 2.206072  | -0.316358 |
| 10               | 1                | 0              | -0.614994               | 1.395351  | 1.220196  |
| 11               | 1                | 0              | -2.315901               | 1.258963  | -1.331037 |
| 12               | 1                | 0              | -2.764025               | 2.044796  | 0.181341  |
| 13               | 1                | 0              | -3.819550               | -0.272928 | -0.109985 |
| 14               | 1                | 0              | -2.831327               | -0.142053 | 1.352882  |
| 15               | 1                | 0              | -1.965082               | -1.384298 | -1.317682 |
| 16               | 1                | 0              | -2.236917               | -2.247188 | 0.215243  |
| 17               | 6                | 0              | 2.168020                | -1.261389 | -0.652729 |
| 18               | 6                | 0              | 2.274753                | 1.241633  | -0.594564 |
| 19               | 6                | 0              | 1.799619                | -0.049128 | 1.517418  |
| 20               | 1                | 0              | 3.244963                | -1.318044 | -0.450251 |
| 21               | 1                | 0              | 1.695585                | -2.167767 | -0.263288 |
| 22               | 1                | 0              | 2.033488                | -1.250299 | -1.742671 |
| 23               | 1                | 0              | 3.360776                | 1.142762  | -0.476413 |
| 24               | 1                | 0              | 2.068237                | 1.352116  | -1.667622 |
| 25               | 1                | 0              | 1.975072                | 2.169417  | -0.094315 |
| 26               | 1                | 0              | 2.871913                | -0.144889 | 1.730218  |
| 27               | 1                | 0              | 1.446907                | 0.860209  | 2.018406  |
| 28               | 1                | 0              | 1.284743                | -0.905733 | 1.963736  |



**11c<sup>ax</sup>**

Standard orientation:

| Center<br>Number | Atomic<br>Number | Atomic<br>Type | Coordinates (Angstroms) |           |           |
|------------------|------------------|----------------|-------------------------|-----------|-----------|
|                  |                  |                | X                       | Y         | Z         |
| 1                | 8                | 0              | -0.828837               | -1.241065 | -0.376813 |
| 2                | 6                | 0              | 0.221730                | -1.237026 | 0.588052  |
| 3                | 6                | 0              | 1.095125                | 0.026197  | 0.500872  |
| 4                | 6                | 0              | 0.184081                | 1.267707  | 0.633129  |
| 5                | 6                | 0              | -1.011377               | 1.199091  | -0.332733 |
| 6                | 6                | 0              | -1.726653               | -0.147447 | -0.197218 |
| 7                | 1                | 0              | 0.807707                | -2.141238 | 0.392895  |
| 8                | 1                | 0              | -0.214622               | -1.322364 | 1.599491  |
| 9                | 6                | 0              | 1.949346                | 0.043096  | -0.776676 |
| 10               | 1                | 0              | 1.777118                | 0.006655  | 1.364542  |
| 11               | 1                | 0              | 0.763184                | 2.185499  | 0.466120  |
| 12               | 1                | 0              | -0.196291               | 1.320348  | 1.664470  |
| 13               | 1                | 0              | -0.674171               | 1.321081  | -1.369984 |
| 14               | 1                | 0              | -1.719164               | 2.013883  | -0.127958 |
| 15               | 1                | 0              | -2.504841               | -0.271185 | -0.956685 |
| 16               | 1                | 0              | -2.202622               | -0.227164 | 0.797287  |
| 17               | 1                | 0              | 1.331272                | -0.013976 | -1.678845 |
| 18               | 1                | 0              | 2.551766                | 0.958393  | -0.833989 |
| 19               | 1                | 0              | 2.637857                | -0.811117 | -0.795399 |

**11c<sup>eq</sup>**

Standard orientation:

| Center<br>Number | Atomic<br>Number | Atomic<br>Type | Coordinates (Angstroms) |           |           |
|------------------|------------------|----------------|-------------------------|-----------|-----------|
|                  |                  |                | X                       | Y         | Z         |
| 1                | 8                | 0              | 1.108700                | -1.245626 | -0.262267 |
| 2                | 6                | 0              | -0.261364               | -1.229847 | 0.129205  |
| 3                | 6                | 0              | -0.994247               | 0.033329  | -0.345037 |
| 4                | 6                | 0              | -0.240030               | 1.277039  | 0.159791  |
| 5                | 6                | 0              | 1.253759                | 1.195837  | -0.192472 |
| 6                | 6                | 0              | 1.837114                | -0.141244 | 0.269364  |
| 7                | 1                | 0              | -0.330373               | -1.310253 | 1.230219  |
| 8                | 1                | 0              | -0.705456               | -2.131830 | -0.304499 |
| 9                | 6                | 0              | -2.462364               | 0.021592  | 0.095500  |
| 10               | 1                | 0              | -0.957114               | 0.033619  | -1.445058 |
| 11               | 1                | 0              | -0.354167               | 1.344340  | 1.253703  |
| 12               | 1                | 0              | -0.687643               | 2.188908  | -0.258000 |
| 13               | 1                | 0              | 1.810437                | 2.021225  | 0.272008  |
| 14               | 1                | 0              | 1.386525                | 1.284501  | -1.279377 |
| 15               | 1                | 0              | 1.831726                | -0.197184 | 1.373123  |
| 16               | 1                | 0              | 2.868301                | -0.272322 | -0.072539 |
| 17               | 1                | 0              | -2.549097               | 0.005131  | 1.190272  |
| 18               | 1                | 0              | -2.987261               | 0.914913  | -0.264655 |
| 19               | 1                | 0              | -2.992687               | -0.856274 | -0.295160 |

**11d<sup>ax</sup>**

Standard orientation:

| Center<br>Number | Atomic<br>Number | Atomic<br>Type | Coordinates (Angstroms) |           |           |
|------------------|------------------|----------------|-------------------------|-----------|-----------|
|                  |                  |                | X                       | Y         | Z         |
| 1                | 8                | 0              | 1.636130                | -1.228062 | 0.372326  |
| 2                | 6                | 0              | 0.755406                | -1.230580 | -0.749215 |
| 3                | 6                | 0              | -0.152313               | 0.015296  | -0.837052 |
| 4                | 6                | 0              | 0.769115                | 1.265639  | -0.771055 |
| 5                | 6                | 0              | 1.841326                | 1.201398  | 0.333597  |
| 6                | 6                | 0              | 2.561781                | -0.146603 | 0.313852  |
| 7                | 1                | 0              | 0.184643                | -2.158154 | -0.675377 |
| 8                | 1                | 0              | 1.360047                | -1.286829 | -1.672515 |
| 9                | 6                | 0              | -1.417103               | 0.012350  | 0.095568  |
| 10               | 1                | 0              | -0.570034               | -0.008404 | -1.856394 |
| 11               | 1                | 0              | 0.184050                | 2.186484  | -0.675381 |
| 12               | 1                | 0              | 1.286704                | 1.339261  | -1.739449 |
| 13               | 1                | 0              | 1.394015                | 1.348278  | 1.322099  |
| 14               | 1                | 0              | 2.572771                | 2.008991  | 0.190206  |
| 15               | 1                | 0              | 3.222875                | -0.266104 | 1.177788  |
| 16               | 1                | 0              | 3.172957                | -0.242051 | -0.602282 |
| 17               | 6                | 0              | -1.094722               | 0.104728  | 1.602267  |
| 18               | 6                | 0              | -2.329413               | 1.200509  | -0.287301 |
| 19               | 6                | 0              | -2.227919               | -1.283072 | -0.145124 |
| 20               | 1                | 0              | -2.016164               | -0.015453 | 2.187328  |
| 21               | 1                | 0              | -0.387801               | -0.670421 | 1.913673  |
| 22               | 1                | 0              | -0.670365               | 1.079158  | 1.868903  |
| 23               | 1                | 0              | -3.254480               | 1.174475  | 0.302136  |
| 24               | 1                | 0              | -1.853779               | 2.169121  | -0.097971 |
| 25               | 1                | 0              | -2.610527               | 1.164486  | -1.348316 |
| 26               | 1                | 0              | -3.201772               | -1.216857 | 0.355563  |
| 27               | 1                | 0              | -2.416163               | -1.449381 | -1.214388 |
| 28               | 1                | 0              | -1.722967               | -2.170093 | 0.252549  |

**11d<sup>eq</sup>**

Standard orientation:

| Center<br>Number | Atomic<br>Number | Atomic<br>Type | Coordinates (Angstroms) |           |           |
|------------------|------------------|----------------|-------------------------|-----------|-----------|
|                  |                  |                | X                       | Y         | Z         |
| 1                | 8                | 0              | 2.065721                | -1.233614 | -0.295935 |
| 2                | 6                | 0              | 0.705018                | -1.232130 | 0.134503  |
| 3                | 6                | 0              | -0.053808               | 0.022440  | -0.343656 |
| 4                | 6                | 0              | 0.708112                | 1.268145  | 0.161061  |
| 5                | 6                | 0              | 2.193851                | 1.199800  | -0.230435 |
| 6                | 6                | 0              | 2.803968                | -0.128341 | 0.214645  |
| 7                | 1                | 0              | 0.675342                | -1.307728 | 1.235365  |
| 8                | 1                | 0              | 0.278523                | -2.147108 | -0.281587 |
| 9                | 6                | 0              | -1.587051               | 0.007416  | -0.013386 |
| 10               | 1                | 0              | 0.021173                | 0.018049  | -1.442806 |
| 11               | 1                | 0              | 0.632069                | 1.330313  | 1.256546  |
| 12               | 1                | 0              | 0.265252                | 2.187408  | -0.238232 |
| 13               | 1                | 0              | 2.750417                | 2.033218  | 0.219891  |
| 14               | 1                | 0              | 2.296618                | 1.290308  | -1.320434 |
| 15               | 1                | 0              | 2.832809                | -0.183932 | 1.318130  |
| 16               | 1                | 0              | 3.825228                | -0.252274 | -0.158753 |
| 17               | 6                | 0              | -1.871543               | 0.046866  | 1.504051  |
| 18               | 6                | 0              | -2.266273               | 1.227654  | -0.673995 |
| 19               | 6                | 0              | -2.237946               | -1.264689 | -0.603462 |
| 20               | 1                | 0              | -2.953835               | 0.020041  | 1.683742  |
| 21               | 1                | 0              | -1.433693               | -0.810181 | 2.029101  |
| 22               | 1                | 0              | -1.487157               | 0.960737  | 1.971213  |
| 23               | 1                | 0              | -3.352962               | 1.183118  | -0.528808 |
| 24               | 1                | 0              | -1.920762               | 2.176298  | -0.249289 |
| 25               | 1                | 0              | -2.075528               | 1.251674  | -1.754841 |
| 26               | 1                | 0              | -3.329509               | -1.213467 | -0.505013 |
| 27               | 1                | 0              | -2.005119               | -1.373877 | -1.670699 |
| 28               | 1                | 0              | -1.910606               | -2.176658 | -0.091995 |

**11e<sup>ax</sup>**

Standard orientation:

| Center<br>Number | Atomic<br>Number | Atomic<br>Type | Coordinates (Angstroms) |           |           |
|------------------|------------------|----------------|-------------------------|-----------|-----------|
|                  |                  |                | X                       | Y         | Z         |
| 1                | 8                | 0              | -1.763669               | 0.000000  | -0.115167 |
| 2                | 6                | 0              | -0.995871               | 1.182551  | -0.332806 |
| 3                | 6                | 0              | 0.209961                | 1.255942  | 0.608902  |
| 4                | 6                | 0              | 1.105568                | 0.000000  | 0.506686  |
| 5                | 6                | 0              | 0.209961                | -1.255942 | 0.608902  |
| 6                | 6                | 0              | -0.995871               | -1.182551 | -0.332806 |
| 7                | 1                | 0              | -1.680685               | 2.018503  | -0.160451 |
| 8                | 1                | 0              | -0.676697               | 1.221541  | -1.388598 |
| 9                | 1                | 0              | -0.165037               | 1.350071  | 1.637063  |
| 10               | 1                | 0              | 0.790658                | 2.163664  | 0.392187  |
| 11               | 1                | 0              | 1.784093                | 0.000000  | 1.371483  |
| 12               | 6                | 0              | 1.986467                | 0.000000  | -0.754846 |
| 13               | 1                | 0              | -0.165037               | -1.350071 | 1.637063  |
| 14               | 1                | 0              | 0.790658                | -2.163664 | 0.392187  |
| 15               | 1                | 0              | -1.680685               | -2.018503 | -0.160451 |
| 16               | 1                | 0              | -0.676697               | -1.221541 | -1.388598 |
| 17               | 1                | 0              | 2.633863                | 0.885719  | -0.777063 |
| 18               | 1                | 0              | 2.633863                | -0.885719 | -0.777062 |
| 19               | 1                | 0              | 1.399752                | 0.000000  | -1.680616 |

**11e<sup>eq</sup>**

Standard orientation:

| Center<br>Number | Atomic<br>Number | Atomic<br>Type | Coordinates (Angstroms) |           |           |
|------------------|------------------|----------------|-------------------------|-----------|-----------|
|                  |                  |                | X                       | Y         | Z         |
| 1                | 8                | 0              | 1.836263                | 0.000000  | -0.338730 |
| 2                | 6                | 0              | 1.229397                | -1.182753 | 0.175942  |
| 3                | 6                | 0              | -0.261909               | -1.252834 | -0.163273 |
| 4                | 6                | 0              | -1.004484               | 0.000000  | 0.336452  |
| 5                | 6                | 0              | -0.261909               | 1.252834  | -0.163273 |
| 6                | 6                | 0              | 1.229397                | 1.182753  | 0.175942  |
| 7                | 1                | 0              | 1.371961                | -1.219754 | 1.271117  |
| 8                | 1                | 0              | 1.781273                | -2.017834 | -0.266140 |
| 9                | 1                | 0              | -0.696314               | -2.161084 | 0.278324  |
| 10               | 1                | 0              | -0.375376               | -1.335756 | -1.253915 |
| 11               | 1                | 0              | -0.954575               | 0.000000  | 1.438254  |
| 12               | 1                | 0              | -0.696314               | 2.161084  | 0.278324  |
| 13               | 1                | 0              | -0.375376               | 1.335756  | -1.253915 |
| 14               | 1                | 0              | 1.371961                | 1.219754  | 1.271117  |
| 15               | 1                | 0              | 1.781273                | 2.017834  | -0.266140 |
| 16               | 6                | 0              | -2.481922               | 0.000000  | -0.070730 |
| 17               | 1                | 0              | -3.000830               | -0.886787 | 0.315050  |
| 18               | 1                | 0              | -3.000830               | 0.886787  | 0.315050  |
| 19               | 1                | 0              | -2.588386               | 0.000000  | -1.163642 |

**11f<sup>ax</sup>**

Standard orientation:

| Center<br>Number | Atomic<br>Number | Atomic<br>Type | Coordinates (Angstroms) |           |           |
|------------------|------------------|----------------|-------------------------|-----------|-----------|
|                  |                  |                | X                       | Y         | Z         |
| 1                | 8                | 0              | 2.647428                | -0.004786 | 0.201822  |
| 2                | 6                | 0              | 1.859469                | 1.174007  | 0.344368  |
| 3                | 6                | 0              | 0.770085                | 1.257564  | -0.728320 |
| 4                | 6                | 0              | -0.154373               | 0.010602  | -0.813683 |
| 5                | 6                | 0              | 0.748665                | -1.251912 | -0.730782 |
| 6                | 6                | 0              | 1.850780                | -1.179268 | 0.333530  |
| 7                | 1                | 0              | 2.557054                | 2.012167  | 0.247287  |
| 8                | 1                | 0              | 1.433644                | 1.208318  | 1.360251  |
| 9                | 1                | 0              | 1.282402                | 1.354410  | -1.695521 |
| 10               | 1                | 0              | 0.195782                | 2.180473  | -0.592351 |
| 11               | 1                | 0              | -0.565489               | 0.023093  | -1.833851 |
| 12               | 6                | 0              | -1.445053               | 0.003079  | 0.088416  |
| 13               | 1                | 0              | 1.245073                | -1.375063 | -1.702974 |
| 14               | 1                | 0              | 0.158209                | -2.161829 | -0.569964 |
| 15               | 1                | 0              | 2.541795                | -2.021057 | 0.222171  |
| 16               | 1                | 0              | 1.433025                | -1.220003 | 1.351449  |
| 17               | 6                | 0              | -2.214840               | 1.331309  | -0.093333 |
| 18               | 6                | 0              | -2.377626               | -1.132609 | -0.396785 |
| 19               | 6                | 0              | -1.187624               | -0.202746 | 1.596174  |
| 20               | 1                | 0              | -3.205700               | 1.261833  | 0.372727  |
| 21               | 1                | 0              | -1.699449               | 2.178816  | 0.371779  |
| 22               | 1                | 0              | -2.363700               | 1.567259  | -1.155333 |
| 23               | 1                | 0              | -3.314228               | -1.127210 | 0.174522  |
| 24               | 1                | 0              | -2.634457               | -1.010992 | -1.457110 |
| 25               | 1                | 0              | -1.929018               | -2.124326 | -0.272397 |
| 26               | 1                | 0              | -2.139830               | -0.173359 | 2.141832  |
| 27               | 1                | 0              | -0.724387               | -1.173055 | 1.806696  |
| 28               | 1                | 0              | -0.547057               | 0.578654  | 2.018705  |

**111<sup>eq</sup>**

Standard orientation:

| Center<br>Number | Atomic<br>Number | Atomic<br>Type | Coordinates (Angstroms) |           |           |
|------------------|------------------|----------------|-------------------------|-----------|-----------|
|                  |                  |                | X                       | Y         | Z         |
| 1                | 8                | 0              | 2.810288                | -0.000009 | 0.282802  |
| 2                | 6                | 0              | 2.182157                | 1.177607  | -0.212829 |
| 3                | 6                | 0              | 0.700257                | 1.247989  | 0.168318  |
| 4                | 6                | 0              | -0.061633               | 0.000010  | -0.329172 |
| 5                | 6                | 0              | 0.700251                | -1.247967 | 0.168329  |
| 6                | 6                | 0              | 2.182145                | -1.177612 | -0.212842 |
| 7                | 1                | 0              | 2.292873                | 1.216169  | -1.311840 |
| 8                | 1                | 0              | 2.740582                | 2.016740  | 0.213368  |
| 9                | 1                | 0              | 0.278705                | 2.167197  | -0.256625 |
| 10               | 1                | 0              | 0.626312                | 1.329302  | 1.260781  |
| 11               | 1                | 0              | 0.015193                | 0.000015  | -1.430668 |
| 12               | 1                | 0              | 0.278668                | -2.167188 | -0.256559 |
| 13               | 1                | 0              | 0.626339                | -1.329231 | 1.260796  |
| 14               | 1                | 0              | 2.292852                | -1.216165 | -1.311854 |
| 15               | 1                | 0              | 2.740562                | -2.016756 | 0.213345  |
| 16               | 6                | 0              | -1.598420               | -0.000002 | -0.017402 |
| 17               | 6                | 0              | -2.255876               | 1.247129  | -0.649212 |
| 18               | 6                | 0              | -2.255952               | -1.246747 | -0.649894 |
| 19               | 6                | 0              | -1.895596               | -0.000400 | 1.497002  |
| 20               | 1                | 0              | -3.346220               | 1.202524  | -0.535411 |
| 21               | 1                | 0              | -1.918934               | 2.177376  | -0.178924 |
| 22               | 1                | 0              | -2.036585               | 1.312612  | -1.723220 |
| 23               | 1                | 0              | -3.346268               | -1.202319 | -0.535753 |
| 24               | 1                | 0              | -2.036955               | -1.311448 | -1.724009 |
| 25               | 1                | 0              | -1.918798               | -2.177301 | -0.180365 |
| 26               | 1                | 0              | -2.979647               | -0.000171 | 1.667755  |
| 27               | 1                | 0              | -1.487723               | -0.886882 | 1.996212  |
| 28               | 1                | 0              | -1.487258               | 0.885557  | 1.996768  |

## 9 B3LYP/6-31+G\*-Calculated Data of Distinguished Conformers of Cyclopentane and the Chair Conformation of Cyclohexane

### 9.1 Cyclopentane

(A) Planar conformer ( $D_{5h}$ -symmetry):  $E + \text{ZPVE} = -196.414753$  Hartree,  $\text{ZPVE} = 370047.9 \text{ J mol}^{-1}$ ,  $G^{298} = -196.441562$  Hartree,  $i = -203$  and  $-201 \text{ cm}^{-1}$ .

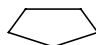

Standard orientation:

| Center Number | Atomic Number | Coordinates (Angstroms) |           |           |
|---------------|---------------|-------------------------|-----------|-----------|
|               |               | X                       | Y         | Z         |
| 1             | 6             | -0.776827               | -1.069161 | 0.000000  |
| 2             | 6             | 0.776986                | -1.069138 | 0.000000  |
| 3             | 6             | 1.257095                | 0.408265  | 0.000000  |
| 4             | 6             | 0.000000                | 1.321568  | 0.000000  |
| 5             | 6             | -1.257163               | 0.408424  | 0.000000  |
| 6             | 1             | -1.164407               | -1.602134 | 0.876192  |
| 7             | 1             | -1.164407               | -1.602134 | -0.876192 |
| 8             | 1             | 1.164428                | -1.602238 | -0.876169 |
| 9             | 1             | 1.164428                | -1.602238 | 0.876169  |
| 10            | 1             | 1.883850                | 0.611890  | -0.876182 |
| 11            | 1             | 1.883850                | 0.611890  | 0.876182  |
| 12            | 1             | -0.000182               | 1.980548  | -0.876199 |
| 13            | 1             | -0.000182               | 1.980548  | 0.876199  |
| 14            | 1             | -1.883964               | 0.612056  | -0.876191 |
| 15            | 1             | -1.883964               | 0.612056  | 0.876191  |

(B) Envelope conformer ( $C_s$ -symmetry):  $E + \text{ZPVE} = -196.421850$  Hartree,  $\text{ZPVE} = 369950.9 \text{ J mol}^{-1}$ ,  $G^{298} = -196.451165$  Hartree, no imaginary vibrational mode.

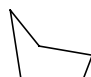

Standard orientation:

| Center Number | Atomic Number | Coordinates (Angstroms) |           |           |
|---------------|---------------|-------------------------|-----------|-----------|
|               |               | X                       | Y         | Z         |
| 1             | 6             | 1.239249                | -0.302683 | -0.201659 |
| 2             | 6             | 0.676147                | 1.115042  | 0.069966  |
| 3             | 6             | -0.877594               | 0.964624  | 0.070438  |
| 4             | 6             | -1.158088               | -0.534815 | -0.202061 |
| 5             | 6             | 0.121240                | -1.252342 | 0.263076  |
| 6             | 1             | 2.196356                | -0.481989 | 0.302057  |
| 7             | 1             | 1.410013                | -0.442160 | -1.278297 |
| 8             | 1             | 1.021828                | 1.838925  | -0.676774 |
| 9             | 1             | 1.022496                | 1.480712  | 1.044415  |
| 10            | 1             | -1.356580               | 1.609333  | -0.675213 |
| 11            | 1             | -1.287056               | 1.255795  | 1.045516  |
| 12            | 1             | -1.298242               | -0.703810 | -1.278869 |
| 13            | 1             | -2.063261               | -0.894696 | 0.301039  |
| 14            | 1             | 0.219681                | -2.266559 | -0.142293 |
| 15            | 1             | 0.129040                | -1.334515 | 1.359862  |

(C) Twist conformer ( $C_2$ -symmetry):  $E + \text{ZPVE} = -196.421908$  Hartree,  $\text{ZPVE} = 369810.3$  J mol<sup>-1</sup>,  $G^{298} = -196.449017$  Hartree,  $i = -12$  cm<sup>-1</sup>.

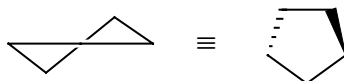

Standard orientation:

| Center Number | Atomic Number | Coordinates (Angstroms) |           |           |
|---------------|---------------|-------------------------|-----------|-----------|
|               |               | X                       | Y         | Z         |
| 1             | 6             | 1.012681                | -0.754531 | 0.247120  |
| 2             | 6             | -0.404195               | -1.226012 | -0.139678 |
| 3             | 6             | -1.308983               | 0.033872  | 0.000231  |
| 4             | 6             | -0.340108               | 1.245615  | 0.139148  |
| 5             | 6             | 1.050774                | 0.700869  | -0.246748 |
| 6             | 1             | 1.803447                | -1.380550 | -0.183328 |
| 7             | 1             | 1.135549                | -0.777271 | 1.339616  |
| 8             | 1             | -0.752517               | -2.064826 | 0.473862  |
| 9             | 1             | -0.401619               | -1.573680 | -1.181180 |
| 10            | 1             | -1.966156               | -0.042195 | 0.874295  |
| 11            | 1             | -1.963049               | 0.143232  | -0.872615 |
| 12            | 1             | -0.320350               | 1.594135  | 1.180146  |
| 13            | 1             | -0.644135               | 2.100519  | -0.475706 |
| 14            | 1             | 1.872831                | 1.285236  | 0.183659  |
| 15            | 1             | 1.174981                | 0.716517  | -1.339187 |

## 9.2 Cyclohexane

Chair conformer:  $E + \text{ZPVE} = -235.715869$  Hartree,  $\text{ZPVE} = 447819.2$  J mol<sup>-1</sup>,  $G^{298} = -235.744664$  Hartree, no imaginary vibrational mode.

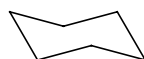

Standard orientation:

| Center Number | Atomic Number | Coordinates (Angstroms) |           |           |
|---------------|---------------|-------------------------|-----------|-----------|
|               |               | X                       | Y         | Z         |
| 1             | 6             | 0.360189                | 1.423627  | 0.227885  |
| 2             | 6             | 1.413545                | 0.400098  | -0.227922 |
| 3             | 6             | 1.053286                | -1.023710 | 0.227903  |
| 4             | 6             | -0.360188               | -1.423628 | -0.227885 |
| 5             | 6             | -1.413545               | -0.400098 | 0.227920  |
| 6             | 6             | -1.053286               | 1.023710  | -0.227901 |
| 7             | 1             | 0.377976                | 1.494376  | 1.326546  |
| 8             | 1             | 0.612474                | 2.422583  | -0.152746 |
| 9             | 1             | 1.485441                | 0.420386  | -1.326487 |
| 10            | 1             | 2.404378                | 0.681011  | 0.153882  |
| 11            | 1             | 1.791647                | -1.741837 | -0.153606 |
| 12            | 1             | 1.106683                | -1.075413 | 1.326559  |
| 13            | 1             | -0.377974               | -1.494377 | -1.326546 |
| 14            | 1             | -0.612473               | -2.422583 | 0.152747  |
| 15            | 1             | -2.404377               | -0.681011 | -0.153889 |
| 16            | 1             | -1.485446               | -0.420388 | 1.326484  |
| 17            | 1             | -1.106686               | 1.075418  | -1.326557 |
| 18            | 1             | -1.791646               | 1.741836  | 0.153612  |



## 10 References

- (1) J. Hartung and M. Schwarz, *Org. Synth., Coll. Vol*, Freeman, J.P. Ed, John Wiley & Sons, New York, 2004, Vol. 10, 437.
- (2) Y. Naruta, Y. Nishigaichi and K. Maruyama, *J. Org. Chem.* 1991, **56**, 2011.
- (3) E. Montaudon, X. Lubeigt and B. Maillard, *J. Chem. Soc., Perkin Trans. I* 1991, 1531.
- (4) J.A. Macphee and J.E. Dubois, *J. Chem. Soc., Perkin Trans I* 1977, 694.
- (5) (a) D.E. Vogel and G.H. Büchi, *Org. Synth.* 1993, **70**, 536. (b) W.S. Johnson, L. Werthemann, W.R. Barlett, T.J. Brockson, T.-T. Li, D.J. Faulkner and M.R. Peterson, *J. Am. Chem. Soc.*, 1970, **92**, 741.
- (6) E.L. Eliel, K.D. Hargrave, K.M. Pietrusiewicz and M. Manoharan, *J. Am. Chem. Soc.*, 1982, **104**, 3635.
